1 ***Klebsiella pneumonia*, one of potential chief culprits of non-alcoholic**  
2 **fatty liver disease: through generation of endogenous ethanol**

3 Xiao Wei<sup>1#</sup>, Xiangna Zhao<sup>1#</sup>, Chen Chen<sup>2#</sup>, Jing Lu<sup>1#</sup>, Weiwei Cheng<sup>1#</sup>, Boxin Li<sup>1</sup>, Huan Li<sup>1</sup>, Weishi  
4 Lin<sup>1</sup>, Changyu Tian<sup>1</sup>, Jiangtao Zhao<sup>1</sup>, Daizhi An<sup>1</sup>, Juqiang Han<sup>3</sup>, Xuejun Ma<sup>4</sup>, Wei Li<sup>5</sup>, Xuesong  
5 Wang<sup>1</sup>, Xiao Chen<sup>1</sup>, Zheng Zhang<sup>1</sup>, Hui Zeng<sup>2</sup>, Ying Sun<sup>9</sup>, Ruifu Yang<sup>6\*</sup>, Di Liu<sup>2,7,8\*</sup>, and Jing Yuan<sup>1\*</sup>

6  
7 <sup>1</sup>Institute of Disease Control and Prevention, PLA, Beijing 100071, China

8 <sup>2</sup>Institute of Infectious Diseases, Beijing Ditan Hospital, Capital Medical University, Beijing key  
9 laboratory of emerging infectious diseases, Beijing 100015, China

10 <sup>3</sup>Institute of Hepatology, PLA Army General Hospital, Beijing 100700, China

11 <sup>4</sup>National Institute for Viral Disease Control and Prevention, Chinese Center for Disease Control and  
12 Prevention, Beijing 102206, China

13 <sup>5</sup>Institute of Microbiology, Chinese Academy of Sciences, Beijing 100101, China

14 <sup>6</sup>Beijing Institute of Microbiology and Epidemiology, Beijing 100071, China

15 <sup>7</sup>Wuhan Institute of Virology, Chinese Academy of Sciences, Wuhan 430071, China

16 <sup>8</sup>University of Chinese Academy of Sciences, Beijing 101408, China.

17 <sup>9</sup>The Department of Immunology, School of Basic Medical Sciences, Capital Medical University,  
18 Beijing, 100069, China

19 <sup>#</sup>These authors contributed equally to this work.

20 <sup>\*</sup>Correspondence: Prof. Jing Yuan, Institute of Disease Control and Prevention, PLA; E-mail:  
21 yuanjing6216@163.com

22 Prof. Di Liu, Wuhan Institute of Virology, Chinese Academy of Sciences; E-mail: liud@wh.iov.cn

23 Prof. Ruifu Yang, Institute of Microbiology, Academy of Military Medical Sciences; E-mail:  
24 ruifuyang@gmail.com

25 **In Brief:** Fatty liver disease induced by high alcohol-producing *Klebsiella pneumoniae*

26 **Competing Financial Interest Statement:** The authors declare no conflicts of interest.

27 **Abstract**

28 Non-alcoholic fatty liver disease (NAFLD), a prelude of cirrhosis and hepatocellular carcinoma, is the  
29 most common chronic liver disease worldwide. NAFLD has been considered to be associated with  
30 the composition of gut microbiota. However, causal relationship between change of gut microbiome  
31 and NAFLD remains unclear. Here we show that *Klebsiella pneumoniae* was significantly associated  
32 with NAFLD through inducing generation of endogenous ethanol. A strain of high alcohol-producing  
33 *Klebsiella pneumoniae* (HiAlc *Kpn*) was initially isolated from fecal samples of patient with  
34 non-alcoholic steatohepatitis (NASH) accompanied with auto-brewery syndrome (ABS). Gavage of  
35 HiAlc *Kpn* was capable of inducing murine model of fatty liver disease (FLD) in which had typical  
36 pathological changes of hepatic steatosis and similar liver gene expression profiles to those of alcohol  
37 intake in mice. Data derived from germ-free mice by gnotobiotic gavage further demonstrated that the  
38 HiAlc *Kpn* is the major cause of the changes in FLD mice. Furthermore, using proteomic and  
39 metabolic analysis, we found that HiAlc *Kpn* induced generation of endogenous alcohol through the  
40 2,3-butanediol fermentation pathway. More interestingly, the blood alcohol concentration was elevated  
41 in FLD mice induced by HiAlc *Kpn* after glucose intake. Clinical analysis showed that HiAlc *Kpn*  
42 were observed in up to 60% of patients with NAFLD. Our results suggested that HiAlc *Kpn* make  
43 important contribution to NAFLD, possibly through generation of the endogenous alcohol. Thus,  
44 targeting these bacteria might provide a novel therapeutic for clinical treatment of NAFLD.

45

46 **Key words:** Fatty liver disease, alcohol-producing bacteria, gut microbiota, *Klebsiella pneumoniae*,  
47 *Endo-AFLD*

48

49 **Introduction**

50 Fatty liver disease (FLD) is a chronic reversible disorder of liver with the hepatic manifestations of  
51 metabolic syndromes, which globally affects 10% to 24% of populations in various countries and up  
52 to 75% in obese subjects<sup>1-3</sup>. According to the etiology and the behavior of alcohol intake, FLD can be  
53 mainly classified as the nonalcoholic FLD (NAFLD) and the alcoholic FLD (AFLD)<sup>4</sup>. Both forms of

54 the disease normally are initiated with fat deposition in liver and followed with liver injury, including  
55 steatohepatitis, inflammation, fibrosis, cirrhosis and hepatocellular carcinoma<sup>4,5</sup>. The major cause of  
56 the AFLD is alcohol intake, while that of the NAFLD remains unclear. Increased evidence has shown  
57 that NAFLD is strongly associated with obesity, the metabolic/insulin resistance syndrome,  
58 dyslipidemia<sup>6-8</sup> and alterations of gut microbiota<sup>9</sup>.

59 Alterations of constitutional microbiota, such as *Firmicutes*, *Bacteroidetes*, *Actinobacteria*, and  
60 *Proteobacteria*, might impair the basic *in vivo* functions including the immune system, the  
61 maintenance of nutrition, xenobiotics metabolism, development and proliferation of intestinal cells,  
62 and protection against aggressor microorganisms. Metagenomic analyses revealed that the metabolic  
63 diseases such as obesity<sup>10-13</sup>, the metabolic syndromes<sup>14</sup>, non-alcoholic steatohepatitis (NASH) and  
64 cirrhosis<sup>9</sup> are the results of disorder of the composition of gut microbiota. Particularly, it has been  
65 shown that the enrichment of *Eubacterium rectale*, *E. rectale*, *Bacteroides vulgates* and *etc.* correlates  
66 with NAFLD, possibly through effecting of harmful metabolic mediators on the host<sup>15</sup>. For example, a  
67 recent study reported that the endogenous alcohol generated by gut microbiota may affect the progress  
68 of NAFLD<sup>16</sup>. Hence, it is of particular interest to identify which bacteria is the major culprit that  
69 causes the development of FLD and to illustrate molecular mechanisms involved in the pathogenesis<sup>9</sup>.  
70 <sup>17, 18</sup>.

71 Our inspiration came from a case of patient with severe NASH, who accompanied with auto-brewery  
72 syndrome and had elevated blood alcohol concentration after eating alcohol-free high-carbohydrates.  
73 Surprisingly, we found that this was due to bacterial rather than that of fungi because antifungal  
74 treatments did not have effects on such syndrome. Here, we reported as the first case of bacterial ABS,  
75 who eventually recovered after antibiotic treatments. In this case, we isolated and identified some  
76 strains of *Klebsiella pneumonia* which were highly associated with endo-alcohol producing (HiAlc  
77 *Kpn*). Considering that the NAFLD might be induced by endo-alcohol, we attempted to connect these  
78 commensal HiAlc *Kpn* and the pathogenesis for hepatic damage. Through gastric gavage of the HiAlc  
79 *Kpn*, we established a murine model of FLD, which confirmed HiAlc *Kpn* is as an important causative  
80 agent of FLD via induction of endogenous alcohol. Using this model, we exposed the pathogenesis of

81 NAFLD and determined the molecular mechanisms of HiAlc *Kpn*-mediated ethanol fermentation.  
82 Finally, we also observed that this HiAlc *Kpn* widely presents in other NAFLD patients. Our findings  
83 might provide benefits for clinical treatments and for potential noninvasive methods to detect  
84 NAFLD.

85

## 86 **Results**

### 87 **HiAlc *Kpn* strongly correlated with NAFLD**

88 The metagenomic analysis of 16S rDNA was performed in 14 consecutive fecal samples collected  
89 from a patient with NASH/ABS, during the pre-onset, onset, recovery, and post-treatment stages (Fig.  
90 S1a). Total 738,865 sequence reads were obtained and were assigned mainly to seven bacterial phyla  
91 (Fig. 1a). When mapping the metagenomic data onto the curves for blood alcohol concentration  
92 (BAC), it was noticed that the distribution of the phylum *Proteobacteria* strongly correlated with  
93 fluctuations of BAC ( $R=0.89$ ) (Fig. 1a). Intriguingly, the abundance of *Klebsiella* of *Proteobacteria*  
94 reached 18.8% in the first day of the morbid state, nine hundred-fold higher than the healthy controls  
95 ( $\sim 0.02\%$ ) (Fig. 1a and Fig. S1b). In contrast, yeast test was negative in these samples.

96 Using the yeast extract peptone dextrose (YPD) medium with 10% alcohol, we isolated two  
97 alcohol-tolerant strains of *K. pneumonia* (W14 and TH1) that produced the highest amounts of alcohol  
98 under both aerobic (63.2 and 60.8 mmol/L, respectively) and anaerobic conditions (36.7 and 31.2  
99 mmol/L, respectively), which named HiAlc *Kpn*. These HiAlc *Kpn* strains appeared as typical mucoid  
100 lactose fermenters, having clear capsules and biofilms and higher growth speed (Fig. 1b-d). The *in*  
101 *vitro* cultivation experiments showed that ethanol production ability of these strains was related to  
102 both carbon source and air conditions (Fig. S1c).

103 To validate the correlation between HiAlc *Kpn* and NAFLD, we analyzed the abundance of *Kpn*, the  
104 ability of alcohol producing as well as the expression of genes associated pathways in patients with  
105 NAFLD ( $n = 43$ ) and control subjects without FLD symptoms ( $n = 48$ ). Results showed that the  
106 abundance and ability producing alcohol of *Kpn* were higher in the feces of NAFLD patients  
107 compared with those of healthy individuals (Fig. 1f-h). With increasing alcohol concentrations of

108 culture medium, more alcohol tolerant bacterial clones with higher alcohol producing ability including  
109 *Kpn* were identified in patients with NAFLD compared with those of controls (Table S1 and Fig. 1h).  
110 In addition, key enzyme genes associated with alcohol producing pathways also expressed at higher  
111 levels in NAFLD patients compared with those of controls. In our cohort, 61% NAFLD patients  
112 carried HiAlc and MidAlc *Kpn* (the alcohol-producing concentration  $\geq 20$ mmol/L), while that was  
113 only 6.25% in controls (Fig. 1i). This suggested that the HiAlc *Kpn* is highly associated with NAFLD.

114

### 115 **HiAlc *Kpn* induced murine model of FLD**

116 To explore association of the HiAlc bacteria and the progression of FLD, we fed groups of the SPF  
117 mice with the HiAlc *Kpn* for 4, 6 and 8 weeks, while mice fed with ethanol and with YPD medium  
118 (pair-fed) were used as positive and negative controls, respectively (Fig. S2a). There were no  
119 significant differences in body weight and liver body mass ratio of mice in all groups studied (Fig.  
120 S2b and 2c). The histological staining showed that microsteatosis and macrosteatosis clearly presented  
121 in the livers of the HiAlc *Kpn*-fed mice at 4 and 8 weeks, respectively, which were comparable with  
122 those of changes in the ethanol-fed mice (Fig. 2a). However, histological and immunohistochemical  
123 stainings of Sirius Red and  $\alpha$ -smooth muscle actin showed that there was no obvious liver fibrosis  
124 (data not shown). These suggested that the HiAlc *Kpn* feeding is capable of inducing development of  
125 hepatic steatosis in mice.

126 Measurements of aspartate transaminase (AST) and alanine transaminase (ALT) in serum, and  
127 triglyceride levels (TG) and thiobarbituric acid-reactive substances (TBARS) in liver showed that  
128 the clinical indices significantly increased in HiAlc *Kpn* gavage groups compared with negative  
129 control mice (Fig. 2b-2e), which further indicated occurrence of the pathophysiological dynamic  
130 changes in livers of these mice. Besides, the numbers of neutrophils and inflammatory foci were also  
131 significantly elevated in HiAlc *Kpn*- and ethanol-fed groups with the time course of gavage (Fig. 2f  
132 and 2g).

133 Furthermore, HiAlc *Kpn*- and ethanol-fed FLD mice had remarkable morphological changes of  
134 intestinal villi (Fig. S2d), accompanying with significant increases of the levels of intestinal diamine

135 oxidase (DAO,  $P<0.05$ ) and D-lactate content (D-LA,  $P<0.05$ ) compared to the pair-fed group (Fig.  
136 2h and 2i), suggesting that the colonization of HiAlc *Kpn in vivo* might affect integrity of epithelium  
137 and intestinal permeability as alcohol did.

138 In addition, we compared effects of several other *Kpn* strains isolated from fecal sample (F0037,  
139 F0039, F0029 and H0018 with abilities of high, middle and low alcohol producing) with those of *K.*  
140 *oxytoca* ATCC8724 which were used in industry, in feeding mice. Same as what observed in  
141 W14/TH1, typical physiologic dynamic in mice liver and the hepatic steatosis occurred at 4 weeks in  
142 the HiAlc strains (Fig. 2j). In middle alcohol producing group, this damage did not occur until 12  
143 weeks. However, these changes were not observed in low alcohol producing group (Fig. 2j).

144

#### 145 **Confirmation of the link between HiAlc *Kpn* and FLD in germ-free mice**

146 To assess whether the HiAlc *Kpn* is the agent caused in FLD, we used germ-free mice in our gavage  
147 model to exclude the potential impact from other symbiotic gut microbiota. After gavage for 4 weeks,  
148 we observed that such mice had a high level of the colonized HiAlc *Kpn* (Fig. 3). Histological staining  
149 with HE and Oil Red O showed clear hepatic steatosis, demonstrating that commensal HiAlc *Kpn*  
150 could initiate the FLD by producing endo-alcohol. Again, AST and ALT, TG, TBARS and the other  
151 clinical indices significantly increased in bacterial fed group (Fig. 3), which further supported that  
152 HiAlc *Kpn* is a key bacteria causing the progress of FLD.

153

#### 154 **Alcohol producing pathway of HiAlc *Kpn***

155 To determine the molecular mechanisms and pathways of endogenous alcohol producing, we  
156 performed comparative proteomic and metabolic analysis in mice feces, *in vitro* and *in vivo* cultivation  
157 in rabbits. Firstly, the results showed that 18 major metabolites were observed significantly increased  
158 in HiAlc *Kpn*- or ethanol-fed mice, including urea, alcohols, sugars, amino acids, and acids (Fig.  
159 S3a-3c; Table S2). Of special interest, 6 of these major metabolites were continuously elevated in  
160 HiAlc *Kpn*-fed, but none of them in ethanol-fed mice (Fig. S3a). Among these metabolites, the highest  
161 peak intensity was 2,3-butanediol, while citric acid and alpha-ketoglutaric acid were in higher

162 concentrations in HiAlc *Kpn*-fed mice. Secondly, *in vitro* tests showed that the intensity of 10  
163 metabolites, including 2,3-butanediol, ethanol and lactic acid were above  $3.8e+006$  (Fig. 4c). Among  
164 these, 2,3-butanediol and ethanol were in accordance with the abundant metabolites identified in the  
165 fecal samples of the HiAlc *Kpn*-fed mice. Thirdly, given that the difference of alcohol producing of  
166 HiAlc *Kpn* in aerobic and anaerobic conditions (Fig. S1c), we separated and identified the proteins  
167 that expressed in both conditions and with different abundance. Comparative proteomic analysis  
168 showed that 66 proteins were with 3-folds changes, consisting of 59 up-regulated and 7  
169 down-regulated proteins (Table S3), while 21/59 proteins (account for 32%) were associated with the  
170 carbohydrate transport and metabolism pathway (Fig. 4a). In rabbit intestinal culture model, 10 of the  
171 21 proteins mentioned above were identified, including the enzymes in the 2,3-butanediol  
172 fermentation pathway (Fig. 4b and Fig. S4a). These results suggested that the *in vitro* ability of HiAlc  
173 *Kpn* to produce alcohol might reflect the status of such bacteria *in vivo* (Fig. S4b). Finally, considering  
174 all potential alcohol producing pathways in bacteria, we found that a majority of the enriched proteins  
175 and metabolites were associated with 2,3-butanediol fermentation pathways (Fig. 4d), which normally  
176 is an ignored pathway in alcohol production from glucose and glycerol metabolism *in vivo*.  
177 Accordingly, the key up-regulated enzymes and metabolites were all occurred in this pathway (Fig.  
178 4d).

179

#### 180 **Liver gene expression dynamics in FLD progression**

181 To further explore the overall development and progression of hepatic steatosis induced by HiAlc *Kpn*,  
182 we detected liver gene expression in HiAlc *Kpn*-, ethanol-, and pair-fed mice. After the gavage for 4  
183 weeks, ten lipogenesis genes (*cyp4a10*, *adipoq*, *cyp4a14*, *srebplc*, *scd1*, *acd*, *lxra*, *lxrβ*, *fas*, and *lcad*)  
184 and one fat oxidation gene (peroxisome proliferator-activated receptor  $\alpha$ , *PPARα*) were up-regulated  
185 in livers from the HiAlc *Kpn*- and the ethanol-fed mice than that in the pair-fed mice (Fig. 5a).  
186 Following these, we examined liver transcriptional profiles during FLD progression at 4, 6, and 8  
187 weeks respectively, using microarray technology. Compared with the negative control group, a large  
188 number of genes which expressed over 2-fold were mainly observed in the samples of the HiAlc *Kpn*-

189 and ethanol-fed mice, after 4-week gavage, while samples of mice with 6- and 8-week gavage showed  
190 less differentially expressed genes (Fig. S5a-5b).

191 Based on the differentially expressed genes, we further analyzed the enrichment on KEGG pathways,  
192 which occurred in both HiAlc *Kpn*- and ethanol-fed mice (Table S4). In the early stage (4 weeks), the  
193 common KEGG pathways were mainly involved, including osteoclast differentiation, retinol  
194 metabolism and arachidonic acid metabolism etc., which illustrated the progression of fat stored in  
195 liver cell with damage (Fig. 5b). In contrast, enrichments on biosynthesis of unsaturated fatty acids,  
196 glycerolipid metabolism, retinol metabolism, FoxO signaling pathway and PPAR signaling pathway  
197 might contribute to the process of the development to hepatic steatosis (6 and 8 weeks) (Fig. 5b).  
198 Notably, the pathways of retinol metabolism and FoxO signaling pathway were enriched in all  
199 three-time points observed, while enrichment of PPAR signaling pathway was observed in 4 and 8  
200 weeks. These activated pathways have been proved to directly drive the increase of free fat acid (FFA),  
201 and cause FLD<sup>19-21</sup>. Furthermore, we also compared the enriched pathways between HiAlc *Kpn*-fed  
202 mice and the ethanol-fed mice, and found that a series of cancer-related pathways, including central  
203 carbon metabolism in cancer, colorectal cancer and p53 signaling pathway, were appeared after  
204 4-week gavage, while only the p53 signaling pathway was appeared in the 8-week of the ethanol-fed  
205 mice (Fig. S6a).

206 In addition, analysis of Gene Ontology enrichment on the biological processes with the up-regulated  
207 genes highlighted the common biological processes for HiAlc *Kpn*- and ethanol-fed mice during FLD  
208 progress (Fig. S6b-6c). Apart from hepatic steatosis, the biological processes specifically enriched in  
209 inflammatory in the HiAlc *Kpn*-fed mice.

210

### 211 **Potential clinic diagnostic markers for HiAlc bacteria induced FLD**

212 Based on our findings as above, we then attempted to discover the approach for endogenous alcohol  
213 detection and the potential marker for HiAlc bacteria induced FLD. We firstly compared the gut  
214 microbiota of HiAlc *Kpn*- or ethanol-fed mice against pair-fed mice, but did not find any accumulated  
215 bacteria populations that were related to alcohol absorption (Fig. S7). Then, considering the glucose is



216 the substrate of alcohol producing, we tried to detect the blood alcohol concentration after fed with  
217 alcohol. i) The blood alcohol concentration was detectable in the ethanol-fed mice but not in those of  
218 HiA1c *Kpn*-fed mice without glucose gavage (Fig. 6). ii), However, the HiA1c *Kpn*-fed mice with  
219 glucose gavage had high blood alcohol concentration 2 hours after glucose gavage, which reached the  
220 peak value (111.16 mg/L in W14-fed mice and 75.65 mg/L in TH1-fed mice) at 4 hours (Fig.6), and  
221 the mice became inebriated. These implicated that the blood alcohol concentration following oral  
222 glucose intake might be considered as a clinical non-invasive diagnostic index for the detection of gut  
223 HiA1c bacteria, which might, therefore, further help the classification of FLD.

224

## 225 **DISCUSSION**

226 The liver-gut microbiota axis plays important roles in nutrition absorption and hepatotoxicity, within  
227 which the liver represents the first filter of nutrients, toxins and bacterial metabolites of blood supply  
228 from the intestine<sup>22</sup>. By aids of high-throughput techniques and improved bioinformatic tools,  
229 researches have been conducted to study the correlation of gene expressions in gut microbiota and  
230 host in the progress of NAFLD, and have proposed that gut microbiota was one of the important  
231 environmental factors affecting host metabolism and was highly associated with NAFLD<sup>8,16</sup>.  
232 Considering the variability between NAFLD patients and different metabolic pathways involved,  
233 however, how the gut microbiota cause hepaticsteatosis remains unclear. Herein, we established a  
234 murine model showing that the gavage of HiA1c *Kpn* strains, isolated from a rare NASH/ABS patient,  
235 directly induced FLD. These mice showed similar anatomic and histological appearances to the FLD  
236 mice-induced by alcohol-feeding, suggesting the endogenous alcohol production by gut bacteria could  
237 result in hepatic pathogenesis as those of alcohol intake. Our surveillance analysis of subjects with  
238 FLD indicated that a large proportion of NAFLD patients had endo-alcohol possibly because of HiA1c  
239 *Kpn*.

240 The “two-hit” hypothesis has been proposed to explain the pathogenesis of NAFLD/NASH  
241 progression<sup>23</sup>. The first hit, hepatic steatosis, is closely associated with lipotoxicity-induced  
242 mitochondrial abnormalities, while the second hit includes enhanced lipid peroxidation and increased

243 generation of reactive oxygen species (ROS)<sup>23</sup>. Through the investigation of liver transcriptome, we  
244 identified enriched pathways of steroid hormone biosynthesis, biosynthesis of unsaturated fatty acids,  
245 PPAR, retinol metabolism, arachidonic acid metabolism that would increase the production of FFA,  
246 cause the dysfunction of mitochondria, and promote ROS in the HiAlc *Kpn*-induced mice. Moreover,  
247 a set of pathways of steatosis and inflammation were also unraveled to reflect the liver injury by  
248 constantly alcohol and ROS production. Those pathways discovered coincide with those found in the  
249 study of NAFLD<sup>24</sup>, implying the accordance with the “two-hit” hypothesis. Meanwhile, we also  
250 noticed up-regulated genes and enriched pathways related to alcohol catabolism, suggesting that  
251 excessive alcohol was scavenged from liver to counteract alcohol accumulation, and this accords with  
252 findings of AFLD progression<sup>6, 25</sup>. The increased gut permeability of the HiAlc *Kpn*-induced mice also  
253 resembles the fact of AFLD mice. During the FLD progression, both HiAlc *Kpn*- and alcohol-induced  
254 mice showed the mechanisms of fatty infiltration in the liver and chronic inflammatory responses, and  
255 similar findings have previously been reported in both AFLD and NAFLD studies<sup>5</sup>.

256 These results pointed out that endogenous alcohol is very likely another risk factor for FLD. It is  
257 puzzling that patients with NAFLD and AFLD share many histologic features such as fat deposition  
258 around microvesicular and macrovesicular vessels and the indistinguishable number and size of  
259 Mallory bodies<sup>4</sup>. These similarities in the hepatic responses of NAFLD and alcohol exposure suggest  
260 that such conditions might evoke common pathogenic mechanisms. It is, however, conflicting whether  
261 the endogenous alcohol is the causative agent of NAFLD<sup>26</sup>. Some researchers have proposed that the  
262 elevation of endogenous alcohol is the result of insulin-dependent ADH impairment<sup>27</sup>, while others  
263 hypothesized that the endogenous alcohol is the culprit<sup>5</sup>. In the present study, using the HiAlc *Kpn*  
264 isolated from a patient’s gut, we clearly demonstrated that the endogenous alcohol produced by HiAlc  
265 *Kpn* could result in FLD in normal mice, while middle or low-level alcohol producing strains were  
266 hard to do so. Given observed other species in gut, such as *E. coli*, only having limit ability in alcohol  
267 production, which is hard to determine the roles in FLD progress and to observe the potential  
268 pathways impact by endo-alcohol *in vivo*. More important, HiAlc *Kpn* is not only occurring in a rare  
269 case, but widely in populations with FLD. Therefore, this FLD induced by HiAlc *Kpn*, through

270 generation of endogenous alcohol, is different from AFLD and NAFLD reported previously, or at  
271 least, is a new type of NAFLD, namely Endo-AFLD.

272 Another mystery is that the HiAlc *Kpn* employ the 2,3-butanediol fermentation pathway to produce  
273 high-level endogenous alcohol, and this is different from the alcohol-production pathway used by  
274 yeasts. On the one hand, the pathway is capable of efficiently transforming sugar and glycerol into  
275 alcohols and acids. On the other hand, the metabolites during alcohol catabolism, including  
276 acetaldehyde, acetic acid and fatty acid ethyl esters, might also cause tissue injury and hepatic  
277 steatosis. However, the effects of other metabolites produced during 2,3-butanediol fermentation and  
278 catabolism are still unknown. Thus, the pathways to generate endogenous alcohol within intestine are  
279 to be investigated and the balance of endogenous alcohol production and conversion *in vivo* also  
280 requires to be clarified. Although it is widely accepted that low-carbohydrate, high-fat diet can lead to  
281 extreme weight gain and health risks such as obesity, single hepatic steatosis, and NASH<sup>28</sup>, our results  
282 added that the high-sugar diet might also increase the risk of FLD.

283 Given the high prevalence and increasing incidence of NAFLD, developments of early diagnosis  
284 approach are really required. Generally, alcohol is produced constantly by the intestinal microbiota in  
285 the human gut<sup>29,30</sup>. However, negligible blood alcohol concentration and the inability of gut  
286 microbiota to produce hepatotoxic concentrations of endogenous alcohol are undetectable in clinical  
287 diagnosis of obese, NAFLD, or NASH patients<sup>9</sup>. In the present study, we induced the higher blood  
288 alcohol concentration through feeding mice with high glucose- or fructose-containing food, which  
289 were also inebriated. Therefore, the use of oral glucose tolerance test (OGTT) might provide benefits  
290 for diagnosing Endo-AFLD patients and/or possibly ABS patients. Nevertheless, we did not observe  
291 any significantly increased gut bacteria populations that correlate with Endo-AFLD progression,  
292 although the genus *intestinimonas* significantly decreased. Clearly, additional comprehensive study  
293 needs to be done to further determine whether gut microbiota would be diagnostic markers.

294 Cause-and-effect relationships between gut microbiota and diseases have been recognized for obesity,  
295 inflammatory bowel disease, colorectal cancer, and etc.<sup>12,13,31,32</sup>. Data of the present study further  
296 support the modified Koch's postulates<sup>33</sup>, and prove that HiAlc *Kpn* could result in Endo-AFLD.

297 Moreover, the established mice model system would be further used for study of FLD and ABS. For  
298 the first time, we discovered the use of 2,3-butanediol fermentation pathway within intestine and  
299 determined the molecular mechanisms of alcohol production. More intriguingly, our study raised the  
300 potential connections of cryptic ABS and Endo-AFLD.

301

## 302 **Methods**

### 303 **Correlation of HiAlic *Kpn* and BAC in FLD patients**

304 A rare case of NASH accompanied with ABS (also known as “gut fermentation syndrome”) in a  
305 27-year-old Chinese male, who became inebriated with ethanol concentrations in blood  $\geq 190$  mg/dL,  
306 even to  $\sim 400$  mg/dL (the legal limit for alcohol in China is 20 mg/dL) using a Department of  
307 Transportation-approved alcohol breathalyzer after eating carbohydrates, he was even believed to be a  
308 “closet drinker”. In literature published previously, the underlying cause of ABS is thought to be an  
309 overgrowth of yeast that ferment carbohydrates into ethanol in the gut<sup>34-37</sup>. However, the patient was  
310 an anomaly because periodic auto-brewing was observed each month, and his illness did not subside  
311 after treatment with antifungal agents. Stool cultures and ITS rDNA PCR detection for fungi were also  
312 conducted, and the results were negative for yeast. The dynamic changes in intestinal microbiota  
313 community and the fluctuations in blood alcohol concentration were monitored from this patient. The  
314 activities of alcohol dehydrogenase (ADH) and aldehyde dehydrogenase (ALDH) in his body were  
315 6.552 and 2.116 milli-units/mL, respectively, within normal ranges. The patient was then presented to  
316 a gastroenterology practice, where he underwent a complete gastroenterology workup. All results were  
317 negative. The patient denied having taken any types of yeast (such as probiotics) as nutritional  
318 supplementation and denied having any past history of gastrointestinal disorders or treatments. An  
319 EGD (esophagogastroduodenoscopy) and colonoscopy were conducted and the results were negative.  
320 The patient was then subjected to percutaneous liver biopsy, in which he fulfilled Kleiner’s criteria on  
321 hepatic fat infiltration, inflammation, fibrosis and Computed Tomography (CT) scan and the liver  
322 ultrasound, indicating NASH. Fecal samples from all specimens at different stages were subjected to  
323 metagenome DNA extraction, 16S rRNA sequencing, and metagenome sequencing, 5 healthy

324 individuals were enrolled as control group.

### 325 **Isolation, identification and Biological characteristics of HiA1c *Kpn* in NASH/ABS patient**

326 The high alcohol-producing strains were isolated using YPD medium with 5% alcohol under aerobic  
327 or anaerobic culture with the fecal samples during the morbid stage of the NASH/ABS patient. As for  
328 all isolates, PCR amplification and sequencing of 16SrDNA, microbial morphological analysis,  
329 electron microscope, MALDI-TOF mass spectrometry and automated microdilution techniques were  
330 used to identify bacterial colonies.

331 The growth curves of HiA1c *Kpn* W14 and TH1 were determined as previously described<sup>38</sup>.  
332 Alcohol-producing abilities of HiA1c *Kpn* were performed with YPD medium containing 2%, 4%, 6%,  
333 8%, 10% fructose or glucose as the sole carbon source under aerobic or anaerobic condition,  
334 respectively. Standard strain *Kpn* ATCC2146 was used as control. Capsules of W14 and TH1 were  
335 observed by lactose fermenters on MacConkey agar and using Transmission electron microscope.  
336 Moreover, HiA1c *Kpn* were diluted 1:50 in YPD and cultivated in 6-well plates for 24h, 48h, and 72h,  
337 and biofilm forming was analyzed by Confocal Microscope.

### 338 **High-throughput sequencing of fecal microbiota and data processing**

339 Fresh fecal samples (S1-S14) from different ABS stages, controls (C1-C5), and all mice (W14-, TH1-,  
340 EtOH-, and pair-fed) were collected and sequenced by using 16S rDNA gene V3-V4 region. In  
341 addition, fecal samples from patient at S3 and S9 stages were further analyzed by whole genome  
342 sequencing. Procedures for library generation, sequencing, and processing of longitudinal samples  
343 were as previously described<sup>39</sup>. Briefly, DNA samples were extracted using the QIAamp DNA stool  
344 Mini kit (Qiagen) following the manufacturer's instructions. DNA library preparation was performed  
345 according to the manufacturer's instruction (Illumina). Workflows were used to perform cluster  
346 generation, template hybridization, isothermal amplification, linearization, blocking and denaturation,  
347 and hybridization of the sequencing primers. Samples were run on an Illumina MiSeq for 2×250-bp  
348 paired-end sequencing<sup>40</sup>. The base-calling pipeline (version Illumina Pipeline-0.3) was used to process  
349 the raw fluorescence images and call sequences<sup>40</sup>. High quality reads were extracted by Mothur and  
350 Usearch, and assigned to taxonomy with QIIME (v 1.8.0). Whole metagenome data was assembled

351 with the massively parallel short read assembler SOAPdenovo 2.20<sup>41</sup>, followed by performing the  
352 gene prediction by GeneMark v2.7<sup>42</sup>. All predicted genes were aligned pairwise using BLASTn.  
353 Genes, of which over 90% of their length can be aligned to another one with more than 95% identity  
354 (no gaps allowed), were removed as redundancies to construct a non-redundant gene catalogue.

#### 355 **Bacterial Strains and Growth Conditions**

356 Fecal samples of the patient closely for one incidence cycle were collected, cultivated and purified in  
357 both yeast extract peptone dextrose (YPD) and Maconkey medium(with or without 5% alcohol) under  
358 anaerobic and aerobic conditions at 37°C for 24h. Anaerobic condition was achieved in jars using  
359 AnaeroPacks (Mitsubishi Gas Chemical Company, Tokyo, Japan). Standard strain *K. pneumoniae*  
360 ATCC2146 was used as control.

#### 361 **Measurement of alcohol concentration**

362 Alcohol concentrations of all strains and fecael samples were measured with an ethanol assay kit from  
363 BioVision (Milpitas, CA), following the manufacturer's instructions. The blood samples from the  
364 mice gavaged HiAlc *Kpn* were analyzed by headspace gas chromatography method (HS-GC, 6850  
365 Agilent, with a flame ionization detector FID-Headspace) <sup>30</sup>.

#### 366 **NAFLD patients**

367 Moreover, we recruited forty-three NAFLD patients and forty-eight healthy volunteers who visited  
368 the Affiliated Hospital of Academy of Military Medical Science (AMMS) and Chinese PLA General  
369 Hospital in China for their annual physical examination. The liver imaging and liver biochemistry  
370 results of all NAFLD patients were hepatic steatosis whereas healthy controls were in the normal  
371 range. Physical examination, routine examination of blood, urine and stools, preoperative serological  
372 tests (including the detection of hepatitis B surface antigen, hepatitis C virus antibody, Treponema  
373 pallidum antibody, human immunodeficiency virus antibody), liver function, renal function,  
374 electrolyte, liver ultrasound, electrocardiogram and chest X-ray results were checked in all NAFLD  
375 and controls. Exclusion criteria included hypertension, diabetes, obesity, metabolic syndrome, IBD,  
376 alcoholic fatty liver disease, coeliac disease and cancer. The fecal samples from those groups were  
377 subjected to collect, followed by alcohol-producing ability detection and bacterial isolation. This study

378 was approved by the Institutional Review Board of Affiliated Hospital of AMMS. All participants  
379 signed an informed consent form prior to entering the study. The study conformed to the ethical  
380 guidelines of the 1975 Declaration of Helsinki.

### 381 **Validation the correlation between HiA1c *Kpn* and NAFLD**

382 Metagenomic DNA was extracted from fecal samples of NAFLD patients (n=43) and controls (n=48),  
383 and the abundance of specific gene *rcsA* (capsular polysaccharide synthesis regulating gene) of *Kpn*,  
384 and alcohol-metabolism related enzymes, including Acetion, ADH, ALD, AR, and DR were  
385 determined by RT-PCR analysis. To determine the relative expression of genes and avoid nonspecific  
386 reaction with the target gene from microorganisms, plasmid pGEX-BOT (36.2pg/ $\mu$ l) carrying with  
387 special oligonucleotide sequence from a botanic gene was used as internal standard (Ct = 30).

388 A total of 200 mg dry fecal samples from NAFLD and control objects were washed and fermented  
389 anaerobically in 100mL YPD medium for 12h, alcohol concentrations were detected in  
390 mid-exponential phase at an  $A_{600}$  of 0.9 corresponding to  $1.5 \times 10^8$  CFU/ml. The highest alcohol  
391 producing *Kpn* isolation of each case was selected and detected its alcohol production after cultured  
392 for 12h by using elevated alcohol tolerant experiment in Maconkey medium with 0%, 5%, and 10%  
393 alcohol, respectively.

### 394 **Construction of FLD mice model with strain gavage**

395 Bal B/C Germ-free mice and C57BL/6J SPF mice were fed with a nutritionally adequate diet of  
396 standard laboratory chow for 5 days, then randomly divided into four groups and followed by gavaged  
397 once every two days at 10 mg/100 g body weight ( $\sim 10^7$  CFU/mL *K. pneumoniae*, 300  $\mu$ L) for 8weeks:  
398 HiA1c *Kpn*-fed groups were gavaged a single doses of *K. pneumoniae* W14 or TH1 suspended in YPD  
399 medium ( $\sim 10^7$  CFU/mL, 300  $\mu$ L), ethanol groups as positive control were gavaged a single doses of  
400 ethanol (40% ethanol, 300  $\mu$ L), while pair-fed mice in negative control groups were gavaged YPD  
401 medium (300  $\mu$ L). The gavage was always performed in the early morning. After gavage, mice were  
402 kept on control or ethanol diet and kept in the cages on the warm blanket with circulating water. 70%  
403 mice survived after strain or ethanol feeding. Following gavage, mice were slow-moving, but  
404 conscious and regained normal behavior within 4-6 h. The mice were always euthanized 9 h post

405 gavage. Moreover, high (*K. oxytoca* ATCC8724 and F0037), middle (F0029 and F0039) and low (*Kpn*  
406 ATCC2146 and H0018) alcohol producing isolates or ATCC standard strains were fed to C57BL/6J  
407 SPF mice according to the same method.

408 Continue to monitor the mice weight every weeks. After 4weeks, 6weeks, and 8weeks, the fresh feces  
409 of mice were taken for 16S rRNA and metabolomics analyses. Then, the mice were dissected to detect  
410 serum indices including ALT, AST, TG, TBARS, neutrophils, and inflammatory. The liver and small  
411 intestine were collected for pathological section. The serum levels of ALT and AST, and the contents  
412 of TG, TBARS, neutrophils, and inflammatory in the liver tissues are used to assess liver injury. The  
413 serum levels of DAO and D-LA are used to assess the intestine permeability.

#### 414 **Histology and physiological assays in mice**

415 Harvested Liver were fixed in 10% formalin and processed for H&E and Oil Red O staining. The  
416 serum was collected to measure blood chemistry (ALT, AST), liver TG and TBARS content, hepatic  
417 lipid contents, blood ethanol concentration, serum cytokine levels, real time PCR, lipid peroxidation,  
418 and intestine DAO and D-LA content of gut permeability.

419 To detect hepatic expression of several lipogenesis genes, specific primers targeting the interest genes  
420 were used by real-time qPCR. Briefly, quantitative PCR experiments were performed with a Light  
421 Cycler 2.0 PCR sequence detection system by using the Fast Start DNA Master SYBR Green kit  
422 (Roche Diagnostics). Melting-point-determination analysis allowed the confirmation of the specificity  
423 of the amplification products. The copies numbers of target genes from each sample was calculated by  
424 comparing the Ct values obtained from the standard curves with the Light Cycler 4.0 software.  
425 Standard curves were created by using a serial 10-fold dilution of DNA from pure cultures,  
426 corresponding to  $10^1$ – $10^{10}$  copies/g feces. The data presented are the mean values of duplicate  
427 real-time qPCR analyses.

#### 428 **Mice and Rabbits**

429 Male Germ-free mice of 10-12 weeks were obtained from a breeding colony at the animal facility of  
430 the Third Military Medical University. Eight- to ten-week-old male Specific-pathogen-free (SPF)  
431 C57BL/6J mice were maintained at Academy of Military Medical Sciences in accordance with



432 Academy of Military Medical Sciences Animal Resource Center and the Institutional Animal Care and  
433 Use Committee (IACUC) guidelines. Six adult male Japanese white rabbits with ages ranging from 28  
434 to 32 weeks were provided and kept by Experimental Animal Centre of AMMS. The mean body  
435 weight of the rabbits was 3,549 g ( $\pm 203$ g).

#### 436 **Metabolome Analysis by GC-MS**

437 Fresh fecal samples from FLD mice induced by HiA1c *Kpn* and cultures of HiA1c *Kpn* were all  
438 subjected to metabolome analysis, which were preconditioned according to the manufacturer's  
439 instructions. Briefly, 100  $\mu$ L of each supernatant of fecal sample was spiked with an internal standard  
440 (10  $\mu$ L ribitol solution, 0.2 mg/mL in H<sub>2</sub>O) and vortexed for 30s. The supernatant was dried under a  
441 stream of N<sub>2</sub> gas. The residue was derivatized using a two-step procedure. First, 40  $\mu$ L methoxyamine  
442 hydrochloride (20 mg/mL in pyridine) was added to the residue and shaken at 30°C for 90 min  
443 followed by 40  $\mu$ L MSTFA ( 1% TMCS ) incubated at 37 °C for 30 min. The samples were kept at  
444 room temperature for another 120 min, then stored at 4°C before injection.

445 GC-TOF/MS analysis was performed using a LECO Pegasus 4D system (Leco Corporation, St Joseph,  
446 MI), consisting of an Agilent 7890 gas chromatography coupled to a Pegasus 4D time-of-flight (TOF)  
447 mass spectrometer, with a DB-5 MS column (30 m $\times$ 250 $\mu$ m i.d., 0.25 $\mu$ m, Agilent J&W Scientific,  
448 Folsom, CA, USA). The inlet temperature was 250°C. The carrier gas was helium kept at a constant  
449 flow rate of 1.0 ml/min. The GC temperature programming was set to 1 min isothermal heating at  
450 70°C, followed by 5°C/min temperature ramp to 280°C, and held for 10 min. The transfer line and  
451 ion-source temperatures were 250°C and 220°C, respectively. Electron impact ionization (70 eV) was  
452 set at a detector voltage of 1,575 V. Ten scans per second were recorded over the full mass range of  
453 50-800 m/z. Chromatogram acquisition, library research, and peak area calculation were performed  
454 using the ChromaTOF software (Version 4.5, LecoCorp.). Significantly different molecules were  
455 selected by FDR-adjusted *P* values.

#### 456 **Proteomics analysis of HiA1c *Kpn* bacteria *in vivo* and *in vitro***

457 *In vivo/in vitro* culture assay by a rabbit intestinal model was performed as described previously<sup>43</sup>.  
458 HiA1c *Kpn* cells were diluted 1:50 in YPD and grown to an OD<sub>600</sub> of 1.0 corresponding to  $1.5 \times 10^8$

459 colony forming units/mL. The bacterial culture was washed twice with prewarmed RPMI and  
460 resuspended in YPD medium. An amount of 20 mL of bacterial suspension was placed in dialysis  
461 tubing with a molecular weight cutoff of 20,000 Da (for interchange of the smaller host signal  
462 proteins/molecules in the intestine). After the rabbits were anesthetized, the HiA1c *Kpn* culture was  
463 implanted aseptically within the colon through a 1 cm incision, then the incision was closed using  
464 surgical staples. The tubing containing the HiA1c *Kpn* culture was either incubated in rabbit intestine  
465 for four hours or in vitro at 37°C. The rabbit generally was ambulatory within 4 h. Then, the dialysis  
466 bag containing HiA1c *Kpn* culture was taken out and HiA1c *Kpn* was harvested for alcohol  
467 determination and proteomics analysis. The experiment was performed at least six times.

468 Whole cellular protein extracts were prepared. 2D gel electrophoresis or LC-MS/MS was carried out.  
469 Proteins were considered differentially expressed if their relative intensity differed more than 3-fold  
470 between the two conditions compared. Each experiment was performed at least three times.  
471 MALDI-TOF/TOF MS/MS measurements and Electrospray ionization MS/MS were performed to  
472 identify the proteins. MALDI-TOF/TOF MS/MS measurements were performed on a Bruker Ultraflex  
473 III TOF/TOF-MS (Bruker Daltonics GmbH, Bremen, Germany) equipped with a 337-nm wavelength  
474 nitrogen laser (model LSI 337i; Bruker) working in reflection mode. Electrospray ionization MS/MS  
475 was carried out with a hybrid quadrupole orthogonal acceleration tandem mass spectrometer (Q-TOF2;  
476 Micromass, Manchester, UK). MS/MS peak lists were created by MaxEnt3 (Mass Lynx v3.5;  
477 Micromass), and amino acid sequences were interpreted manually using MassSeq (Micromass).  
478 Peptide mass fingerprinting searches and all of the MS/MS ion data base searches were performed by  
479 using the program Mascot v2.2.06 (Matrix Science Ltd.) licensed in-house against the publically  
480 available Uniprot-Enterobacteriaceae database.

#### 481 **Microarray-Based Gene Expression of HiA1c *Kpn*- fed Mice Liver**

482 Whole genome expression analysis was performed by Shanghai OE Biotech Co., Ltd according to the  
483 protocol of one-color microarray-based gene expression analysis from Agilent Technology. The Agilent  
484 SurePrint G3 Mouse GE Microarray (8\*60K, Design ID:028005) was used in this experiment. Total  
485 RNAs were prepared from livers of mice gavaged for 4 weeks, 6 weeks and 8 weeks by RNeasy mini kit

486 (QIAGEN).The sample labeling, microarray hybridization and washing were performed based on the  
487 manufacturer's standard protocols. Genespring (version13.1, Agilent Technologies) were employed to  
488 finish the basic analysis with the raw data. Differentially expressed genes were then identified through  
489 fold change as well as  $P$  value calculated with t-test. The threshold set for up- and down-regulated  
490 genes was a fold change $\geq$  2.0 and a  $P$  value $\leq$  0.05. Afterwards, GO analysis and KEGG analysis  
491 were applied to determine the roles of these differentially expressed mRNAs.

#### 492 **Time-cause analysis of sugar-riched diet for mice**

493 In the next morning after fed by HiAlc *Kpn*, 300  $\mu$ L of 10% glucose was gavaged to induce alcohol  
494 produce in HiAlc *Kpn*- fed mice, ethanol groups as positive control were gavaged a single doses of  
495 ethanol (40% ethanol, 300  $\mu$ L),and pair-fed mice as negative control. The ethanol concentration in  
496 blood samples from the mice induced was measured at 2, 2.5, 3, 3.5, 4 and 4.5h by HS-GC.

#### 497 **Statistical Analysis**

498 ANOVA and Fisher's tests were performed with R version 3.4.1. Data are expressed as means  $\pm$  SD.  $P$   
499 value less than 0.01 was considered statistically significant.

#### 500 **Data Availability**

501 The whole genome sequences of *K. pneumoniae* W14 and TH1 have been deposited at GenBank  
502 under accession number NZ\_CP015753.1 for W14 and accession number NZ\_CP016159.1 for TH1.  
503 The microarray information and data of mice liver sample are available at NCBI Gene Expression  
504 Omnibus (GEO) databases under the following accession: GSE102489.The raw illumina reads data of  
505 16S rDNA and whole metagenome data for all samples from the patient and mice has been deposited  
506 in the NCBI Sequence Read Archive under accession number SRR5934751 and SRR5934662,  
507 respectively.

508

509 **Supplementary Information** included four tables and seven Supplementary Figures.

510

511 **Acknowledgements** We are grateful to Weijun Chen and Jun Yu for helpful advice; Hong Wei and  
512 Jie Liu of The Third Military Medical University for gnotobiotic mice assays; and YanPing Luo of

513 Affiliated Hospital of Academy of Military Medical Science and Yiming Li of Chinese PLA General  
514 Hospital for providing the fecal samples from NAFLD patients and controls. This work was  
515 supported by a grant from the National Natural Science Foundation of China (31670035, 31370093  
516 and 81790632) to J.Y., and Mega-projects of Science and Technology Research of China Grant  
517 2017ZX100102.

518

519 **Author Contributions** J.Y., D.L., C.C., and Y.-R.F. led and conceived the project, designed and  
520 performed most experiments, analyzed and interpreted the data. J.L., W.-W.C., and B.-X.L. performed  
521 animal experiments and analyzed data. C.-Y.T., D.-Z.A., and X.-J.M. collected samples and  
522 performed clinical study. X.C. and H.Z. performed bacterial growth experiments. X.-S.W., Z.Z.  
523 performed DNA extraction experiments, 16S sequencing and data analysis. W.L., J.-Q.H., H.L., and  
524 W.-S.L. performed and analyzed proteomics and metabolite analysis. X.W. and X.-N.Z. performed  
525 microarray-based gene expression analyses. C.C., D.L. and J.Y. wrote the paper.

526

#### 527 **Main text References**

- 528 1. Abd El-Kader SM, El-Den Ashmawy EMS. Non-alcoholic fatty liver disease: The diagnosis and  
529 management. *World J Hepatol.* 2015; 7:846–858. [PubMed: 25937862 ]
- 530 2. Rinella ME. Nonalcoholic fatty liver disease: a systematic review. *JAMA.* 2015; 313:2263–2273.  
531 [PubMed: 26057287]
- 532 3. Younossi ZM, et al. Global epidemiology of nonalcoholic fatty liver disease-Meta-analytic  
533 assessment of prevalence, incidence, and outcomes. *Hepatol Baltim Md.* 2016; 64:73–84.  
534 [PubMed: 26707365]
- 535 4. Syn WK, Teaberry V, Choi SS, Diehl AM. Similarities and differences in the pathogenesis of  
536 alcoholic and nonalcoholic steatohepatitis. *Semin Liver Dis.* 2009; 29:200–210. [PubMed:  
537 19387919]
- 538 5. de Medeiros IC, de Lima JG. Is nonalcoholic fatty liver disease an endogenous alcoholic fatty  
539 liver disease? - A mechanistic hypothesis. *Med Hypotheses.* 2015; 85:148–152. [PubMed:

- 540 25956735]
- 541 6. Baker SS, Baker RD, Liu W, Nowak NJ, Zhu L. Role of alcohol metabolism in non-alcoholic  
542 steatohepatitis. *PloS One*. 2010; 5:e9570. [PubMed: 20221393]
- 543 7. Nair S, Cope K, Risby TH, Diehl AM, Terence, RH. Obesity and female gender increase breath  
544 ethanol concentration: potential implications for the pathogenesis of nonalcoholic steatohepatitis.  
545 *Am J Gastroenterol*. 2001; 96:1200–1204. [PubMed: 11316170]
- 546 8. Zhu L, et al. Characterization of gut microbiomes in nonalcoholic steatohepatitis (NASH) patients:  
547 a connection between endogenous alcohol and NASH. *Hepatology*. 2013; 57: 601–609.  
548 [PubMed: 23055155]
- 549 9. Del Chierico F, et al. Gut microbiota profiling of pediatric nonalcoholic fatty liver disease and  
550 obese patients unveiled by an integrated meta-omics-based approach. *Hepatology*. 2017;  
551 65:451–464. [PubMed: 27028797]
- 552 10. Ley RE, et al. Obesity alters gut microbial ecology. *Proc Natl Acad Sci U S A*. 2005; 102:  
553 11070–11075. [PubMed: 16033867]
- 554 11. Ley RE, Peterson DA, Gordon JI. Ecological and evolutionary forces shaping microbial diversity  
555 in the human intestine. *Cell*. 2006; 124:837–848. [PubMed: 16497592]
- 556 12. Turnbaugh PJ, et al. An obesity-associated gut microbiome with increased capacity for energy  
557 harvest. *Nature*. 2006; 444:1027–1031. [PubMed: 17183312]
- 558 13. Turnbaugh PJ, et al. A core gut microbiome in obese and lean twins. *Nature*. 2009; 457:480–484.  
559 [PubMed: 19043404]
- 560 14. Vijay-Kumar M, et al. Metabolic syndrome and altered gut microbiota in mice lacking Toll-like  
561 receptor 5. *Science*. 2010; 328:228–231. [PubMed: 20203013]
- 562 15. Leung C, Rivera L, Furness JB, Angus PW. The role of the gut microbiota in NAFLD. *Nat Rev*  
563 *Gastroenterol Hepatol*. 2016; 13:412–425. [PubMed: 27273168]
- 564 16. Boursier J, Diehl AM. Nonalcoholic Fatty Liver Disease and the Gut Microbiome. *Clin Liver Dis*.  
565 2016; 20:263–275. [PubMed: 27063268]
- 566 17. Cope K, Risby T, Diehl AM. Increased gastrointestinal ethanol production in obese mice:

- 567 implications for fatty liver disease pathogenesis. *Gastroenterology*. 2000;119:1340–1347.  
568 [PubMed: 11054393]
- 569 18. Musso G, Gambino R, Cassader M. Non-alcoholic fatty liver disease from pathogenesis to  
570 management: an update. *Obes Rev Off J Int Assoc Study Obes*. 2010; 11:430–445. [PubMed:  
571 19845871]
- 572 19. Berger J, Moller DE. The mechanisms of action of PPARs. *Annu Rev Med*. 2002; 53:409–435.  
573 [PubMed: 11818483]
- 574 20. Zwolak A, Szuster-Ciesielska A, Daniluk J, Semeniuk J, Kandefler-Szerszen M. Chemerin, retinol  
575 binding protein-4, cytokeratin-18 and transgelin-2 presence in sera of patients with non-alcoholic  
576 liver fatty disease. *Ann Hepatol*. 2016; 15:862–869. [PubMed: 27740519]
- 577 21. Guzmán C, et al. The human liver fatty acid binding protein (FABP1) gene is activated by  
578 FOXA1 and PPAR $\alpha$ ; and repressed by C/EBP $\alpha$ : Implications in FABP1 down-regulation in  
579 nonalcoholic fatty liver disease. *Biochim Biophys Acta*. 2013; 1831:803–818. [PubMed:  
580 2331827]
- 581 22. Fukui H. Gut-liver axis in liver cirrhosis: How to manage leaky gut and endotoxemia. *World J*  
582 *Hepatol*. 2015; 7:425-442. [PubMed: 25848468]
- 583 23. Buzzetti E, Pinzani M, Tsochatzis EA. The multiple-hit pathogenesis of non-alcoholic fatty liver  
584 disease (NAFLD). *Metabolism*. 2016; 65:1038-1048. [PubMed: 26823198]
- 585 24. Tilg H, Moschen AR. Evolution of inflammation in nonalcoholic fatty liver disease: the multiple  
586 parallel hits hypothesis. *Hepatology*. 2010; 52:1836-1846. [PubMed: 21038418]
- 587 25. Chen YP, Jin X, Kong M, Li YM. Pattern of microRNA expression associated with different  
588 stages of alcoholic liver disease in rat models. *Mol Med Rep*. 2014;10:1195-1204. [PubMed:  
589 25017766]
- 590 26. Yu J, Marsh S, Hu J, Feng W, Wu C. The Pathogenesis of Nonalcoholic Fatty Liver Disease:  
591 Interplay between Diet, Gut Microbiota, and Genetic Background. *Gastroenterol Res Pract*. 2016;  
592 2016: 2862173-286185. [PubMed: 27247565]
- 593 27. Engstler AJ, et al. Insulin resistance alters hepatic ethanol metabolism: studies in mice and

- 594 children with non-alcoholic fatty liver disease. *Gut*. 2016; 65:1564–1571. [PubMed: 26006114]
- 595 28. Lamont BJ, Waters MF, Andrikopoulos S. A low-carbohydrate high-fat diet increases weight gain  
596 and does not improve glucose tolerance, insulin secretion or  $\beta$ -cell mass in NZO mice. *Nutr.*  
597 *Diabetes*. 2016; 6: e194-200. [PubMed: 26878317]
- 598 29. Sarkola T, Eriksson CJ. Effect of 4-methylpyrazole on endogenous plasma ethanol and methanol  
599 levels in humans. *Alcohol Clin Exp Res*. 2001; 25:513–516. [PubMed: 11329490]
- 600 30. Watanabe-Suzuki K, Seno H, Ishii A, Kumazawa T, Suzuki O. Ultra-sensitive method for  
601 determination of ethanol in whole blood by headspace capillary gas chromatography with  
602 cryogenic oven trapping. *J Chromatogr B Biomed Sci App*. 1999; 727:89–94. [PubMed:  
603 10360426]
- 604 31. Chung H, et al. Gut immune maturation depends on colonization with a host-specific microbiota.  
605 *Cell*. 2012; 149:1578–1593. [PubMed: 22726443]
- 606 32. Yu T, et al. *Fusobacterium nucleatum* Promotes Chemoresistance to Colorectal Cancer by  
607 Modulating Autophagy. *Cell*. 2017; 170: 548–563.e16. [PubMed: 28753429]
- 608 33. Evans AS. Causation and disease: the Henle-Koch postulates revisited. *Yale J Biol Med*. 1976; 9:  
609 175–195. [PubMed: 782050]

610

611 **Methods-only References**

612

- 613 34. Iwata S, Kato K, Kotani S, Tamura T. Demonstration of endo-N-acetylglucosaminidase and  
614 endo-N-acetylmuramidase as impurities in a crude commercial preparation of  $\alpha$ -amylase from  
615 barley. *Biken J*. 1972;15, 123-133. [PubMed: 4643690]
- 616 35. Kaji H, et al. The auto-brewery syndrome--the repeated attacks of alcoholic intoxication due to  
617 the overgrowth of *Candida (albicans)* in the gastrointestinal tract. *Mater Medica Pol*. 1976; 8:  
618 429-435. [PubMed: 1027959]
- 619 36. Dahshan A, Donovan K. Auto-brewery syndrome in a child with short gut syndrome: case report  
620 and review of the literature. *J Pediatr Gastroenterol Nutr*. 2001; 33:214-215. [PubMed:11568528]
- 621 37. Logan BK, Jones AW. Endogenous ethanol 'auto-brewery syndrome' as a drunk-driving defence

- 622 challenge. *Med Sci Law*, 2000; 40:206-215. [PubMed:10976182]
- 623 38. Ben-David A, Davidson CE. Estimation method for serial dilution experiments. *J Microbiol.*  
624 *Methods*. 2014; 107:214–221 (2014). [PubMed:25205541]
- 625 39. Mwaikono KS, et al. High-throughput sequencing of 16S rRNA Gene Reveals Substantial  
626 Bacterial Diversity on the Municipal Dumpsite. *BMC Microbiol.* 2016;16:145-156.  
627 [PubMed:27400733]
- 628 40. Reid DT, et al. Unique microbial-derived volatile organic compounds in portal venous circulation  
629 in murine non-alcoholic fatty liver disease. *Biochim Biophys Acta.* 2016; 1862:1337-1344.  
630 [PubMed:27085070]
- 631 41. Manichanh C, et al. Reduced diversity of faecal microbiota in Crohn’s disease revealed by a  
632 metagenomic approach. *Gut.* 2006; 55:205-211.[PubMed:27085070]
- 633 42. Zhu W, Lomsadze A, Borodovsky M. Ab initio gene identification in metagenomic sequences.  
634 *Nucleic Acids Res.* 2010; 38: e132, 1-15. [PubMed:20403810]
- 635 43. Yuan J, et al. Analysis of host-inducing proteome changes in bifidobacterium longum NCC2705  
636 grown in vivo. *J Proteome Res.* 2008; 7: 375–385 (2008). [PubMed:18027903]

637

638 **Figure legends**

639 **Figure 1**



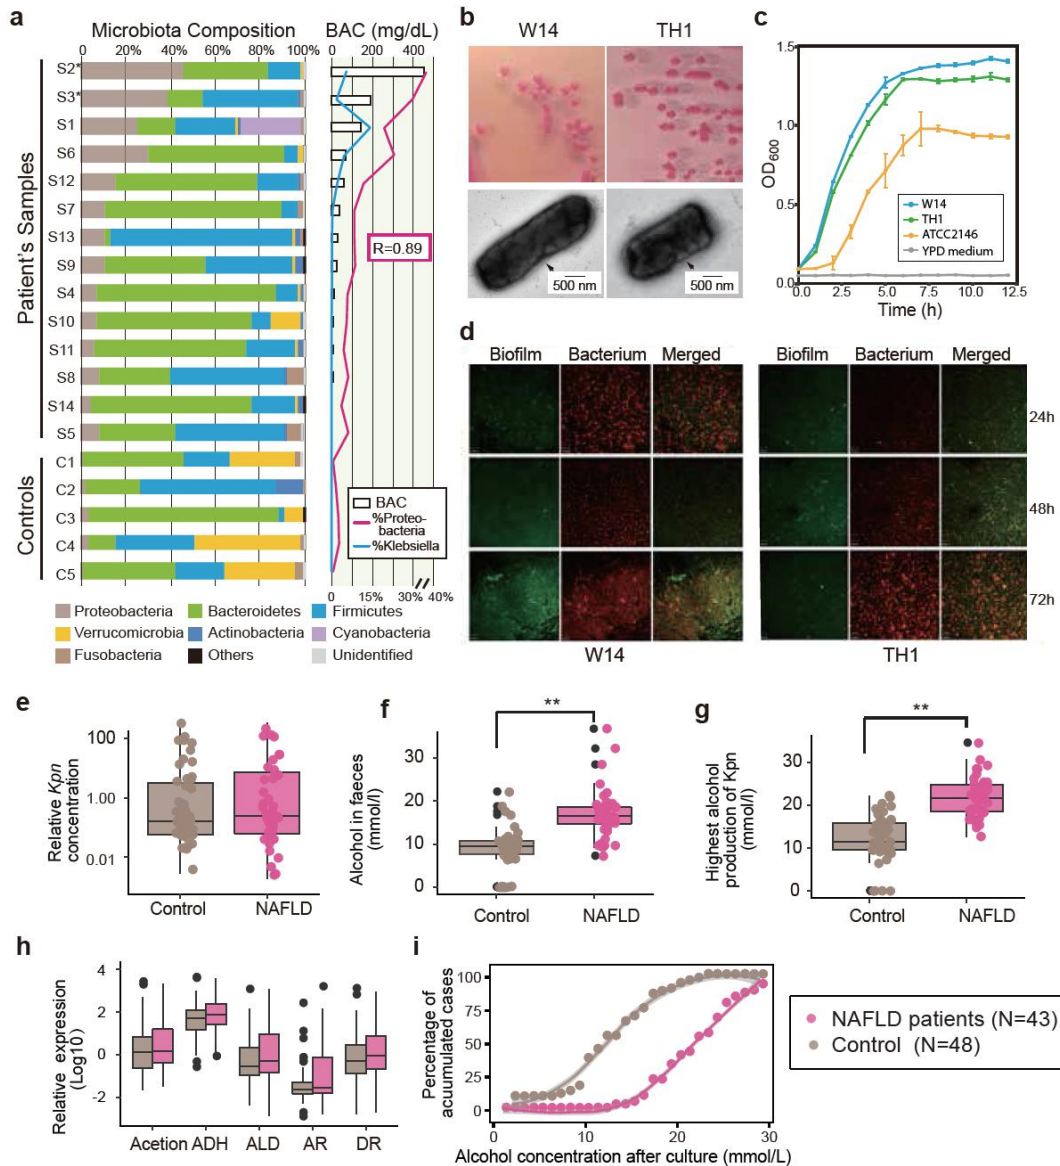

640

641 **Figure 1.**

642 **Commensal HiAlc *Kpn* has a higher statistical chance of initialing NAFLD.** (a) Correlations of  
 643 the NASH/ABS patient's intestinal microbiota and blood alcohol concentration (BAC). Gut  
 644 microbiota compositions of samples are placed according to the BAC (from higher to lower). The  
 645 percentages of *Proteobacteria* and *Klebsiella*, respectively, are outlined. The correlations of  
 646 *Proteobacteria* and BAC are calculated. Colonies and capsules images by TEM (b), growth curves (c),  
 647 and Laser scanning confocal microscopy images to show the biofilm formation of *K. pneumoniae*  
 648 W14 and TH1 isolated from the NASH/ABS patient. (e-h) The alcohol producing ability from *Kpn* in

649 NAFLD population are higher than the controls. **e**, Relative *Kpn* quantification measured. **(f)** Alcohol  
650 producing ability was measured by detection the alcohol concentration in fermented fecal sample in  
651 NAFLD patients (brown box) and the controls (carmine box). **(g)** Alcohol producing ability was  
652 measured with the highest alcohol producing *Kpn* isolation. **(h)** Evaluated the alcohol producing genes.  
653 **(i)** Accumulated cases increased with *Kpn* alcohol producing ability, showing that the NAFLD  
654 patients has a higher chance containing HiAlic *Kpn*. Loess smoothing method was used to regress the  
655 relation between accumulated case and *Kpn* alcohol producing ability with grey shadows. Values are  
656 the mean  $\pm$  SD obtained from multiple independent experiments. In panels: \*P < 0.05, \*\*P < 0.01  
657 (unpaired *t*-test). In box plot, centerline indicates the median; box outlines show 25th and 75th  
658 percentiles, and whiskers indicate 1.5 $\times$  the interquartile range. Extreme values are shown separately  
659 (black dot).

660

661 **Figure 2**

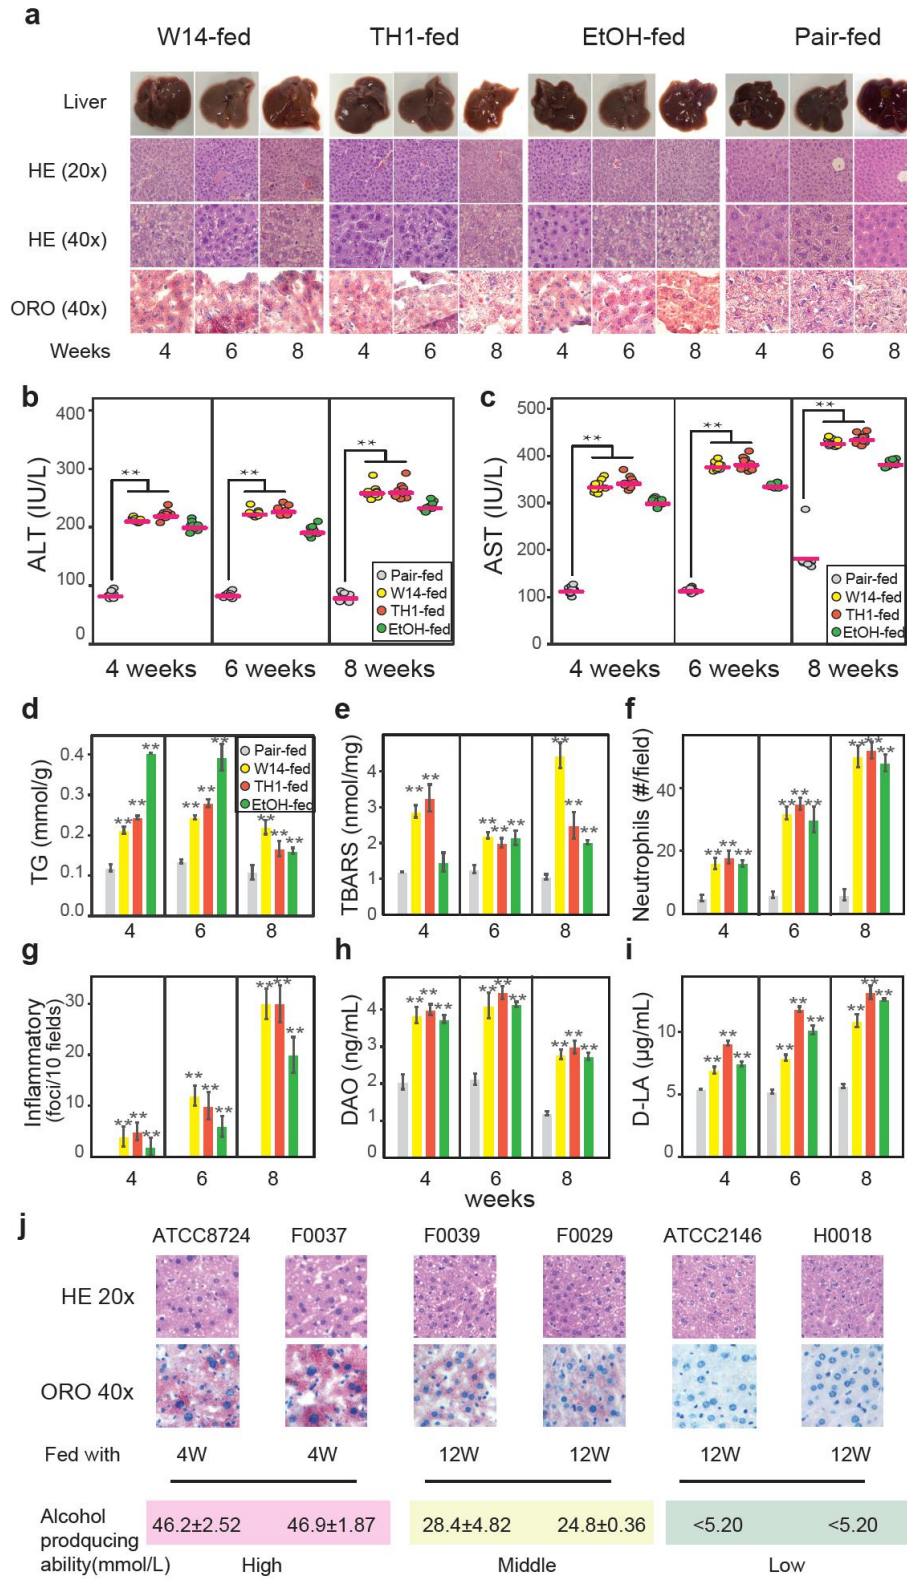

662

663 **Figure 2.**

664 **Mice feeding with HiAlc *Kpn* could establish a chronic hepatic steatosis model.** (a) Anatomy, HE  
665 staining (20× and 40× magnifications), and Oil Red O staining (40× magnification) of SPF mice liver  
666 feeding with HiAlc *Kpn*, EtOH, and pair for 4, 6, and 8 weeks. (b-i) Liver injury and intestinal  
667 permeability of FLD mice induced by HiAlc *Kpn* feeding. The serum levels of ALT (b) and AST (c),  
668 and the contents of TG (d), TBARS (e), neutrophils (f), and inflammatory (g) in the liver tissues are  
669 used to assess liver injury. The serum levels of DAO (h) and D-LA (i) are used to assess the intestine  
670 permeability. (j) The level of alcohol producing ability resulted in different clinical outcomes. High  
671 (ATCC8724 and F0037), middle (F0029 and F0039) and low (ATCC2146 and H0018) alcohol  
672 producing isolates were fed to SPF mice. HE staining (20× magnifications), and Oil Red O staining  
673 (40× magnification) were used to evaluate the liver injure. SPF mice fed with HiAlc and middle  
674 alcohol producing *Kpn* occurs liver injure at 4 weeks and 12 weeks, respectively. However, the mice  
675 fed with low alcohol producing *Kpn* did not show live injure until 12 weeks. Values are the mean ± SD.  
676 In panels: \* $P < 0.05$ , \*\* $P < 0.01$  (unpaired t-test). Values in this figure were obtained from multiple  
677 independent experiments.

678

679 **Figure 3**

680

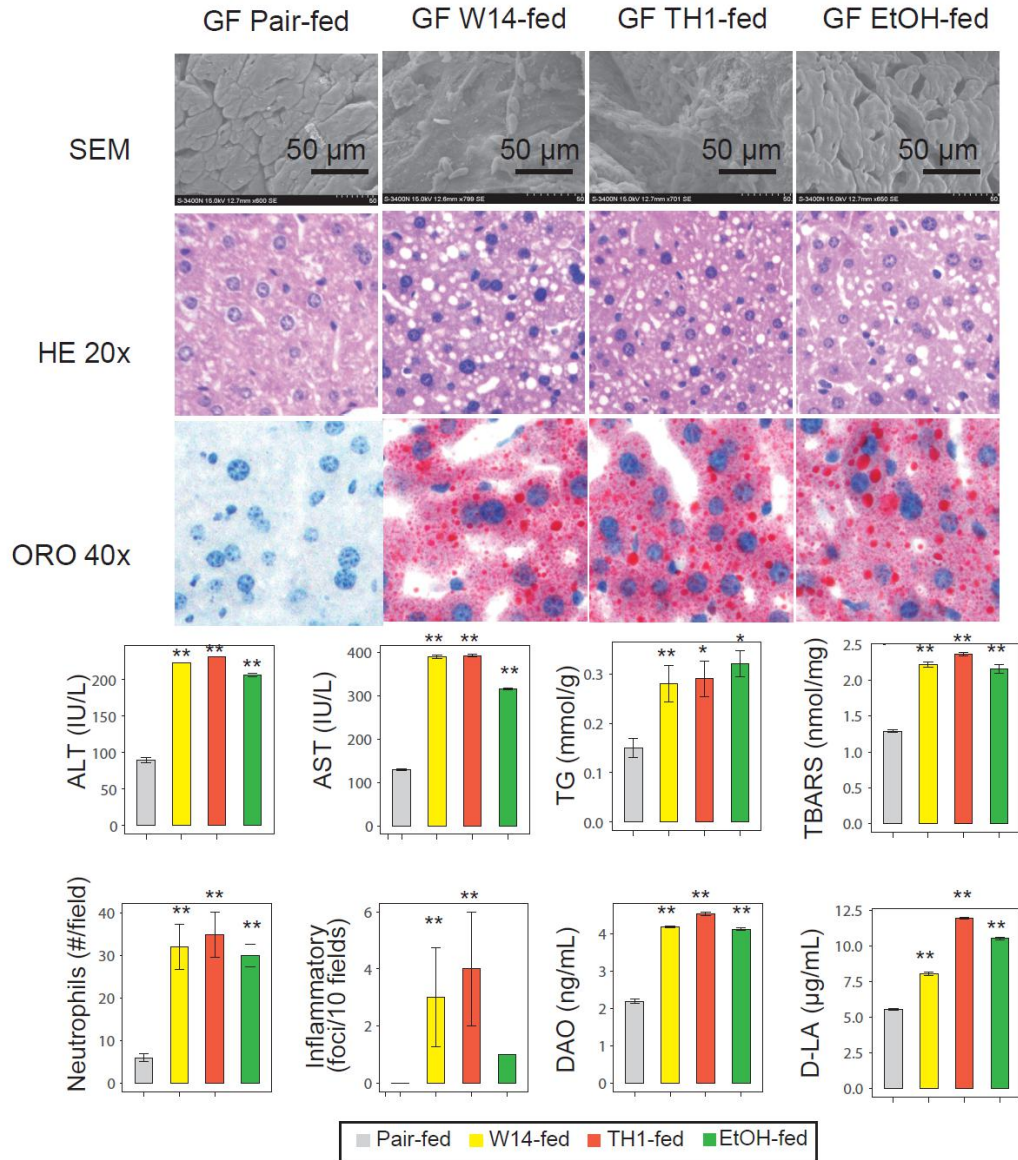

681

682 **Figure 3.**

683 **Confirming the link between HiAlc *Kpn* and NAFLD.** Feeding with HiAlc *Kpn* was an important  
 684 determinant for germ-free (GF) mice in FLD developments. Up panel, scanning electron micrograph  
 685 (SEM) of the proximal colon, showing HiAlc *Kpn* the colonized status in vivo. Middle panel, liver  
 686 histology and assessment of hepatic steatosis with HE staining (20× magnifications), and Oil Red O  
 687 staining (40× magnification). Liver injury and intestinal permeability of GF mice measured by the  
 688 levels of AST, ALT, TG, TBARS, neutrophils, inflammatory, DAO and D-LA. Values are the mean ±

689 SD. In panels: \* $P < 0.05$ , \*\* $P < 0.01$  (unpaired  $t$ -test). Values in this figure were obtained from  
 690 multiple independent experiments.

691

692 **Figure 4**

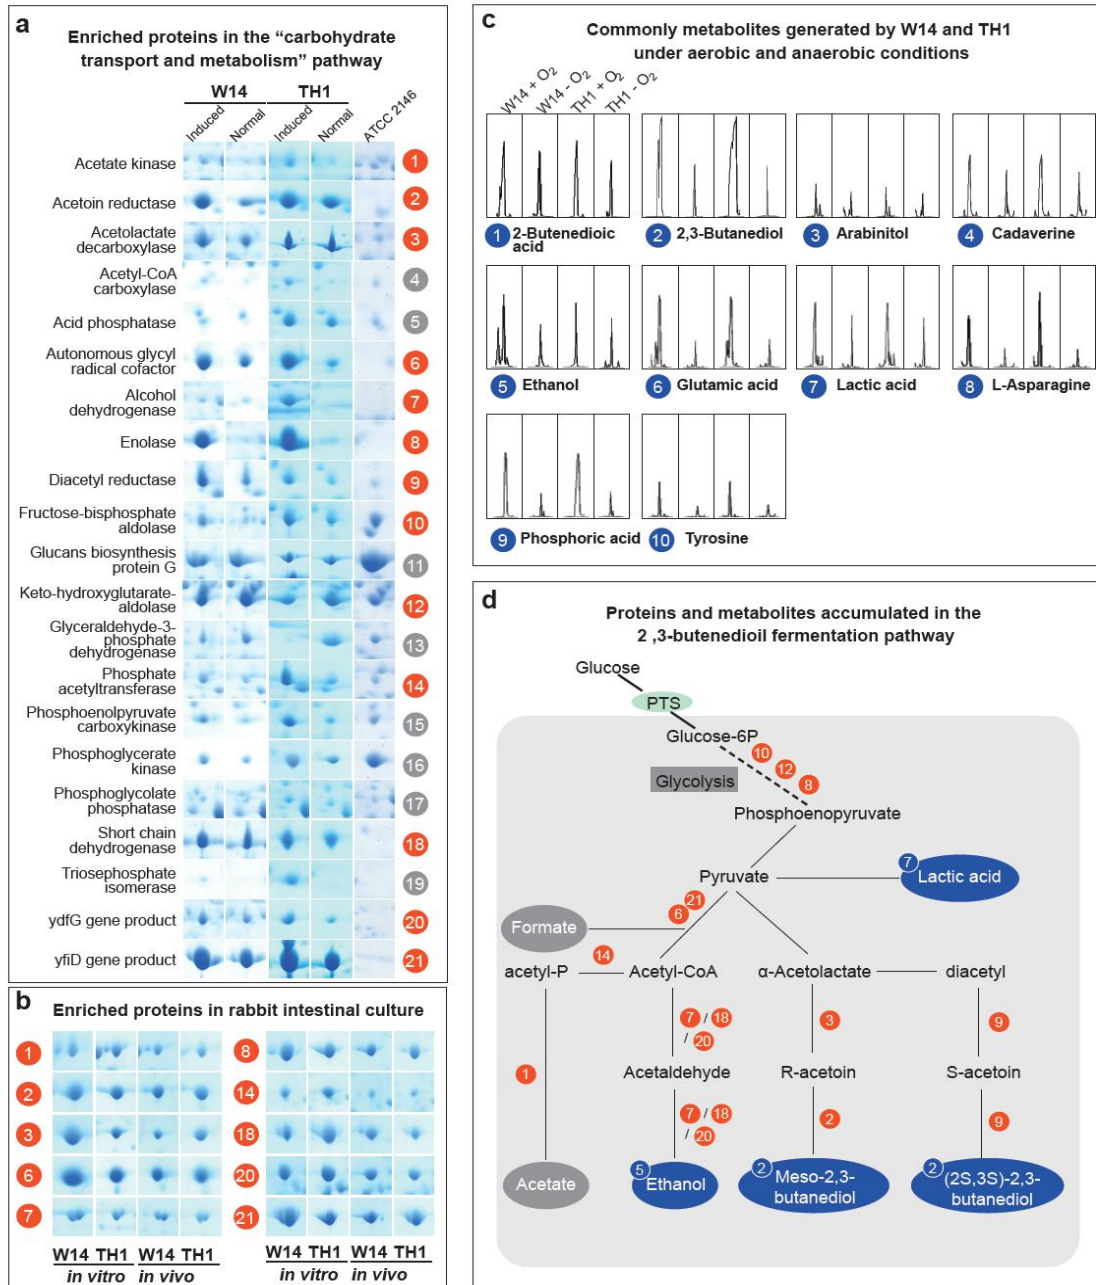

693

694 **Figure 4.**

695 **Proteomic and metabolomic analysis of HiA1c *Kpn* in aerobic and anaerobic conditions. (a)**

696 Significant proteins of HiA1c *Kpn* W14 and TH1 enriched in aerobic and anaerobic conditions.

697 Twenty proteins up-regulated and one protein down-regulated are related to carbohydrate transport

698 and metabolism, in especial the proteins covering 2,3-butanediol fermentation pathway. *Kpn*

699 ATCC2146 is used as control. **(b)** Ten interesting proteins up-regulated of HiA1c *Kpn* W14 and TH1

700 grown to produce ethanol *in vivo* vs. *in vitro* are related to 2,3-butanediol fermentation pathway by

701 using a model of a rabbit intestinal culture. **(c)** Common metabolites produced in HiA1c *Kpn* W14 and

702 TH1 in aerobic and anaerobic conditions (Peak intensity  $\geq 3.8e+006$ ) further confirm the existence of

703 the 2,3-butanediol fermentation pathway. **(d)** Proposed central metabolism of the 2,3-butanediol

704 fermentation pathway in HiA1c *Kpn*. End products and intermediates are emboldened. The enzymes

705 identified of the pathway are shown in red number and the metabolites identified by GC-MS are

706 shown in blue cycles. The number with red or blue circles is according to the protein or metabolites

707 identified in Fig. 4A and Fig. 4C.

708

709 **Figure 5**

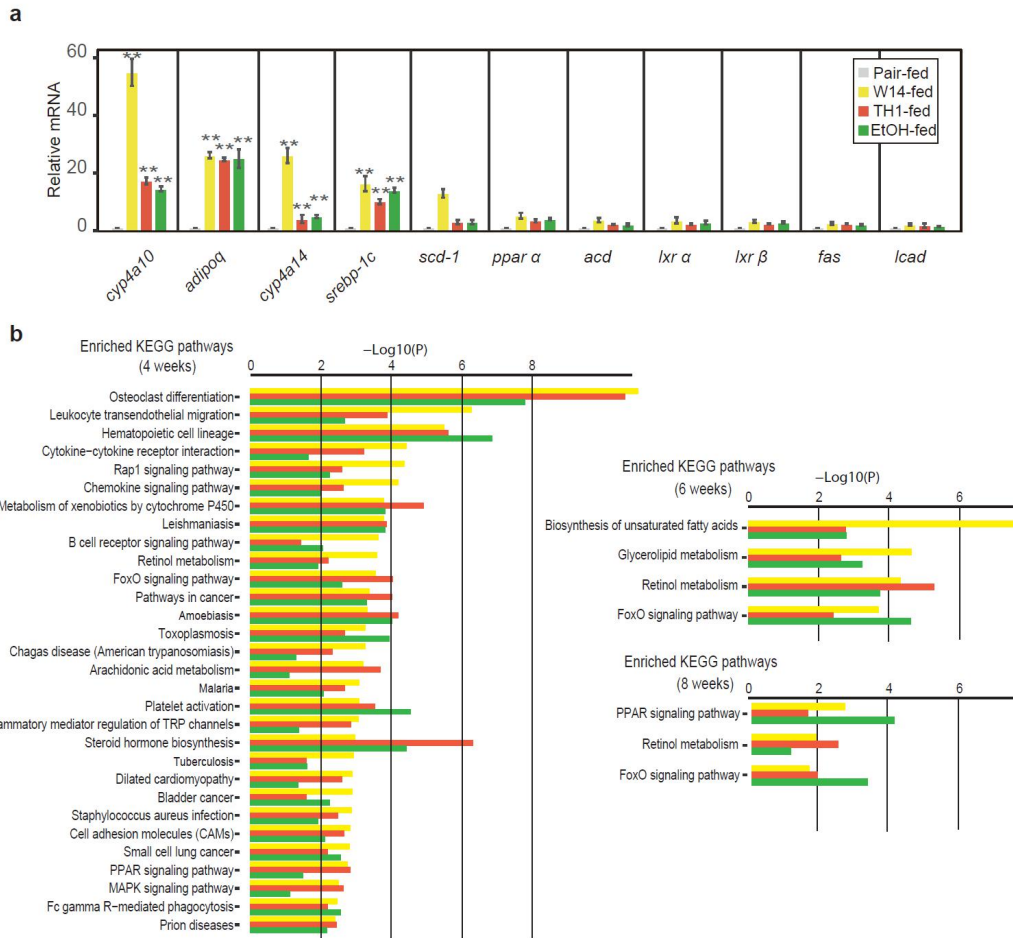

710

711 **Figure 5.**

712 **The key genes and biological processes during HiAlc *Kpn* induced FLD development. (a)**

713 Expressions of related genes to fatty-acid metabolism by using real-time PCR in mice liver after

714 feeding by HiAlc *Kpn* for 4 weeks. (b) Enriched KEGG pathway of HiAlc *Kpn*- and EtOH-fed.

715 Yellow, red and green are used to show HiAlc *Kpn* W14-, TH1-, and EtOH-fed, respectively. The

716 negative 10-based logarithm of *P*-value is used to assess the significance.

717

718 **Figure6**



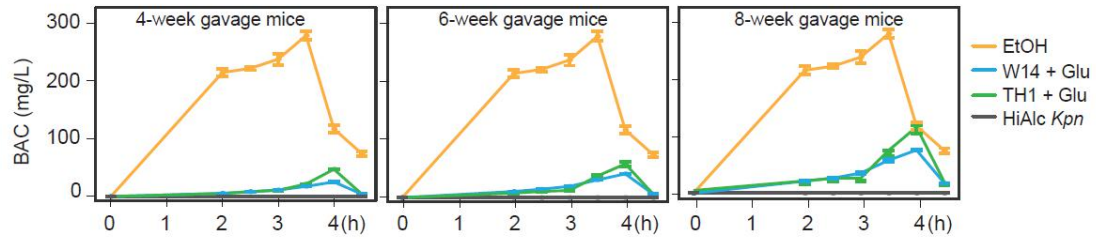

719

720 **Figure 6.**

721 **The blood alcohol concentration in HiAlc bacteria induced FLD mice.** Dynamic changes of blood

722 alcohol concentration of HiAlc *Kpn*-fed mice for 4, 6, and 8 weeks, and measured at 2, 2.5, 3, 3.5, 4

723 and 4.5 h after glucose inducing.

724

725 **Supplementary Figures**

726

727 **Figure S1**

728

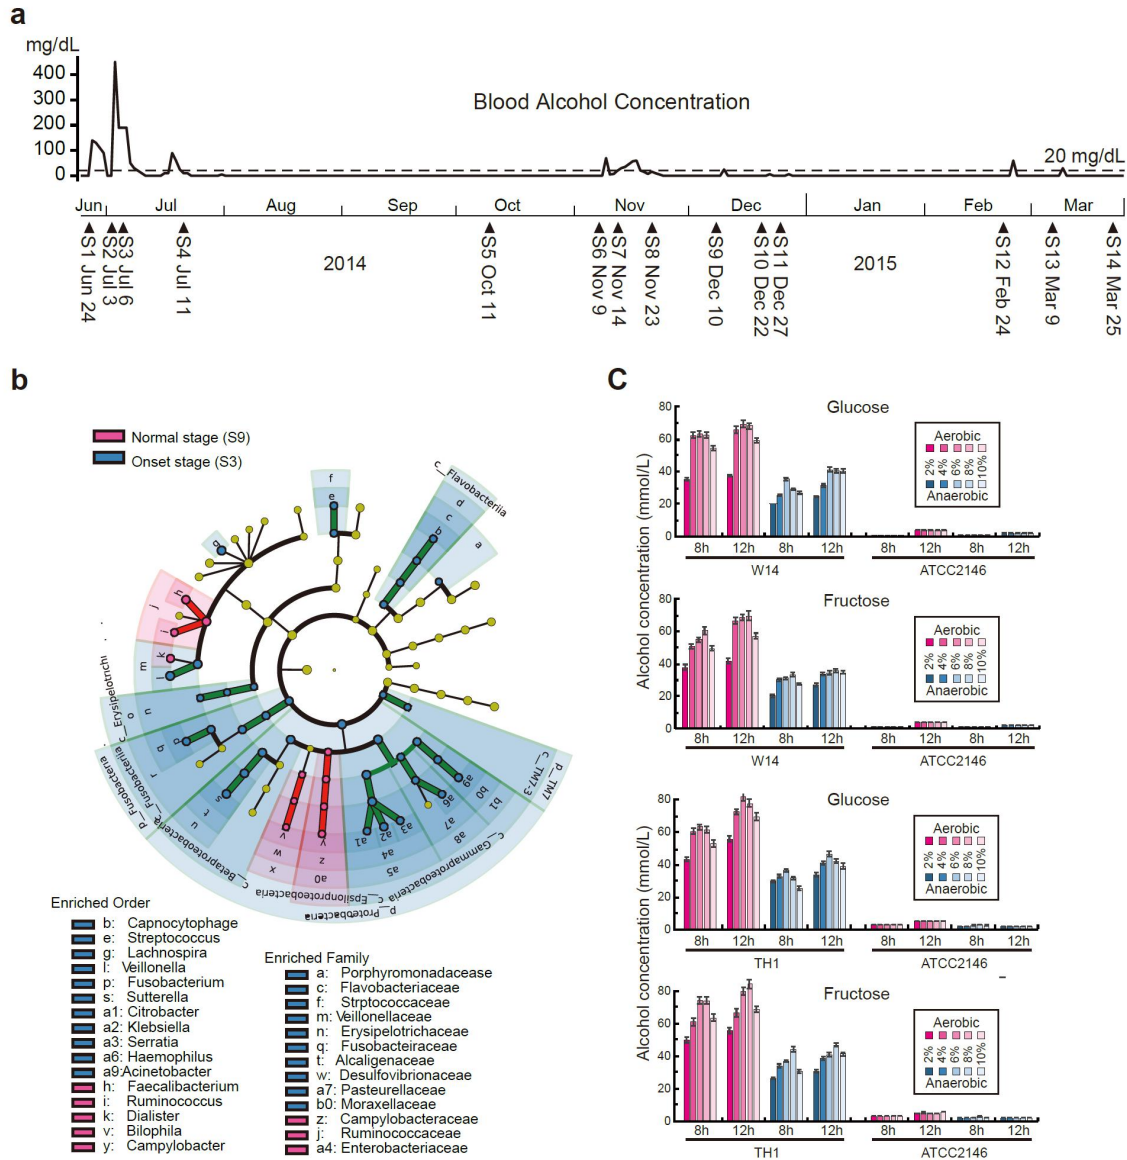

729

730 **Figure S1.**

731 **Timeline for the fecal samples of the patient collected and the whole genome LefSe analysis of**

732 **the NASH/ABS patient. (a) The times of the fecal samples from the patient collected in different**

733 **stages and observation of blood alcohol concentration (BAC). The date was marked as from S1 to S14.**

734 **(b) A cladogram representation of data in NASH/ABS patient in recovery stage and onset stage. Taxa**

735 **enriched in onset (Green) and recovery control (Red). The brightness of each dot is proportional to its**

736 **effect size. (c) Alcohol concentration of *Kpn* W14 and TH1 in YPD medium with sole carbon source**

737 **(fructose or glucose) under aerobic and anaerobic conditions, respectively.**

738 **Figure S2**

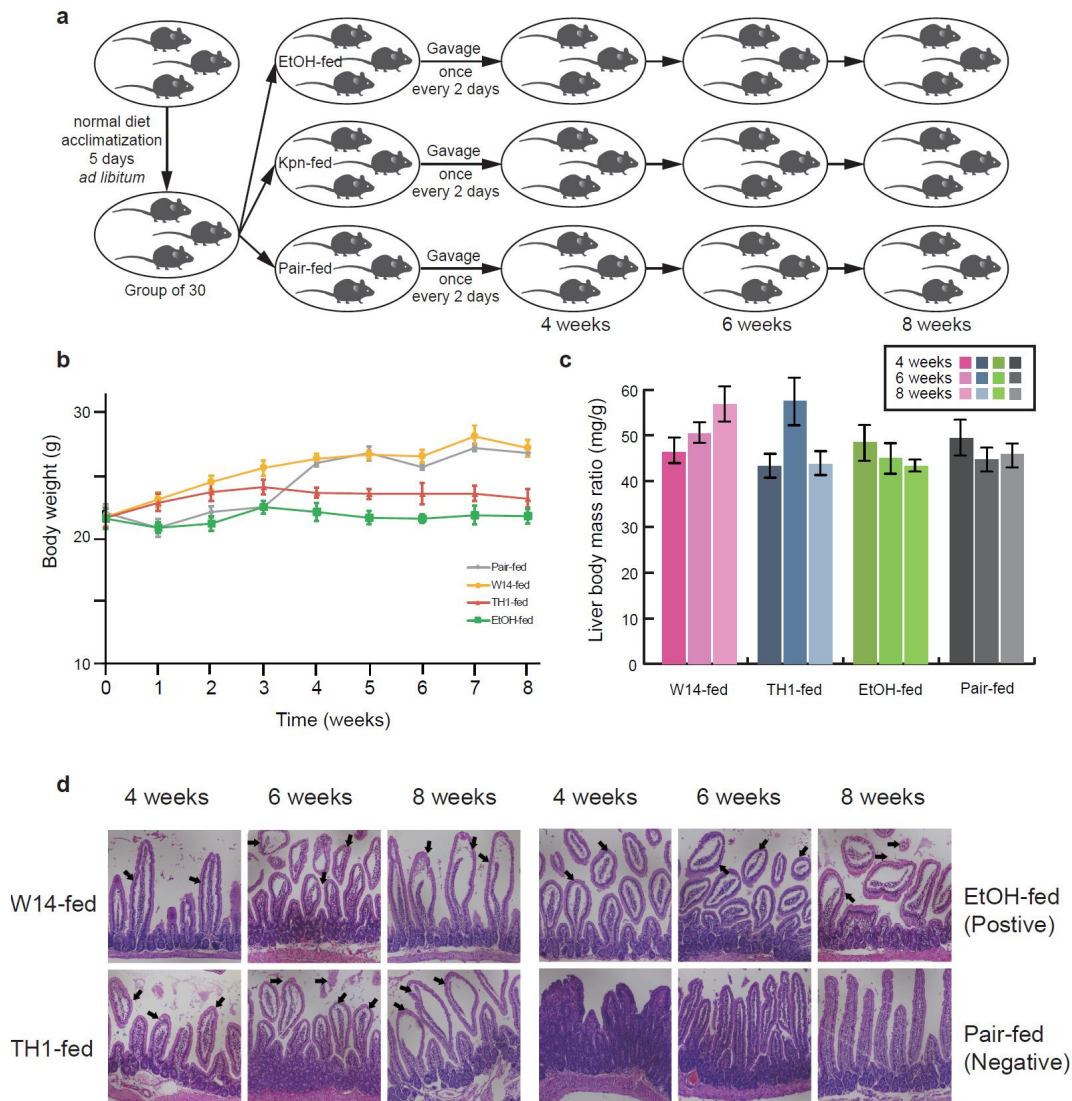

739

740 **Figure S2.**

741 **Physiological changes of FLD mice induced by HiA1c *Kpn*.** (a) Schematic presentation of mice  
742 feeding. (b) Body weight changes of FLD mice during the HiA1c *Kpn* feeding. Data represent means  $\pm$   
743 SD. (c) Liver to body weight ratios of HiA1c *Kpn*-, EtOH-, and pair-fed mice at 4, 6, and 8 weeks. (d)  
744 Intestinal injury of FLD mice induced by HiA1c *Kpn* feeding. The histologic lesions of FLD mice  
745 intestine. The arrows in HE staining (20 $\times$  magnifications) indicated the remarkable atrophy, edema,  
746 and shedding of intestinal villi in HiA1c *Kpn*- and EtOH-fed FLD mice, compared with pair-fed group  
747 ( $P < 0.05$ ).

748 **Figure S3**

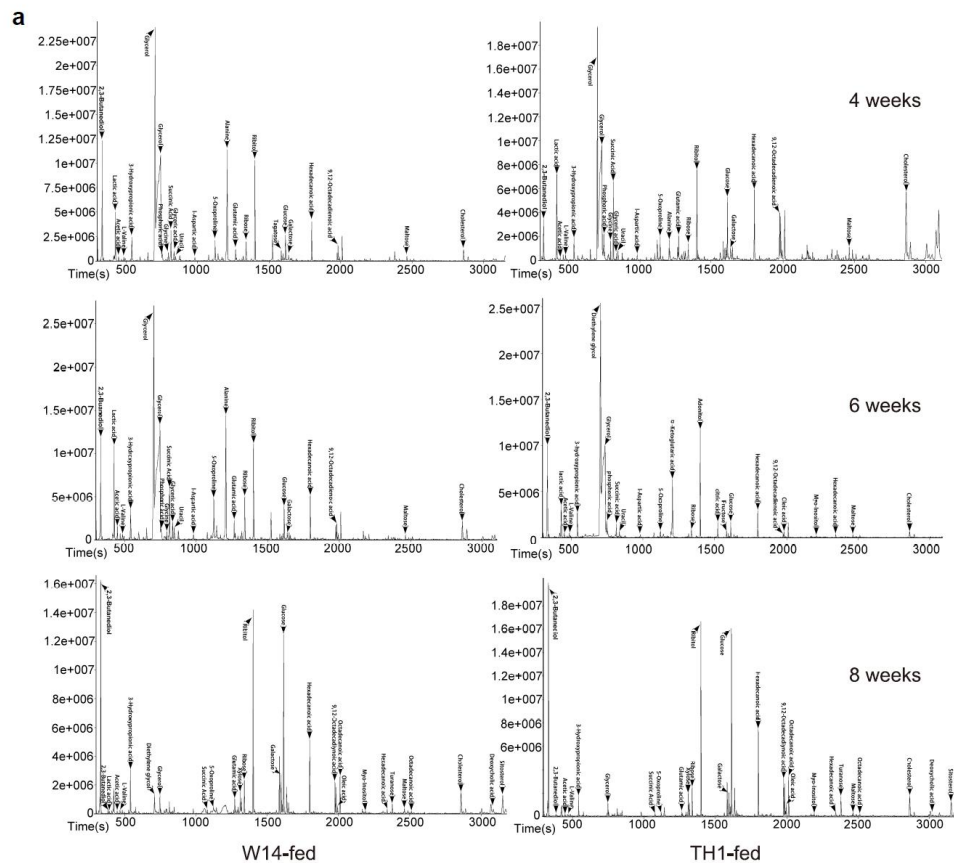

749

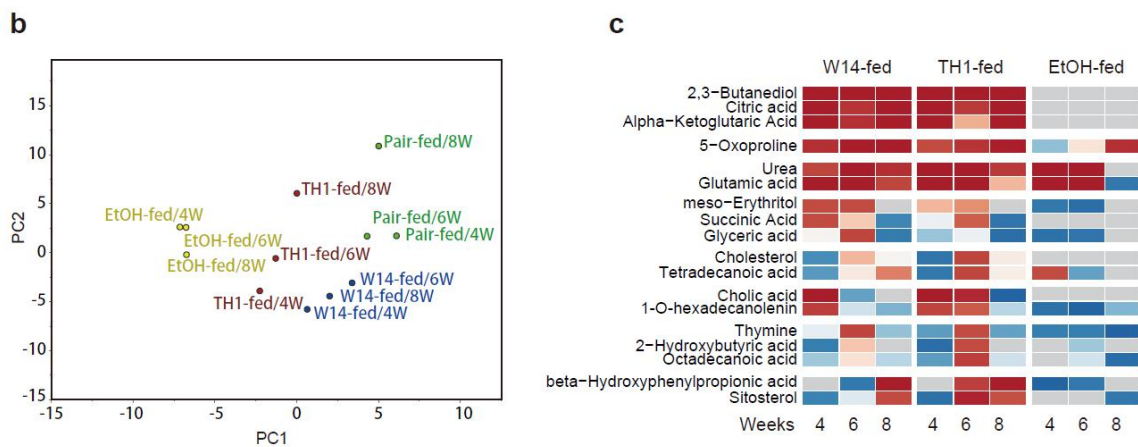

750

751 **Figure S3**

752 **Metabolomic profilings of the fecal samples from FLD mice induced by HiAlc *Kpn* W14 and**  
 753 **TH1 feeding, VOCs identified by GC-MS were marked in the peaks. (a) Metabolomic profilings**  
 754 **of the fecal samples from FLD mice induced by HiAlc *Kpn* W14 and TH1 feeding. (b) PCA analysis**

755 of FLD mice induced by HiAlc *Kpn*-, ethanol-, and pair-fed at 4, 6, and 8 weeks. (c) Comparative  
756 metabolomic analysis of HiAlc *Kpn*-induced FLD mice. Ratios of metabolite intensity in HiAlc *Kpn*-  
757 and EtOH-fed mice (against pair-fed) are shown, and the metabolites are grouped by the pattern  
758 (HiAlc *Kpn*-fed vs. EtOH-fed) of increased level in different stages.

759

760 **Figure S4**

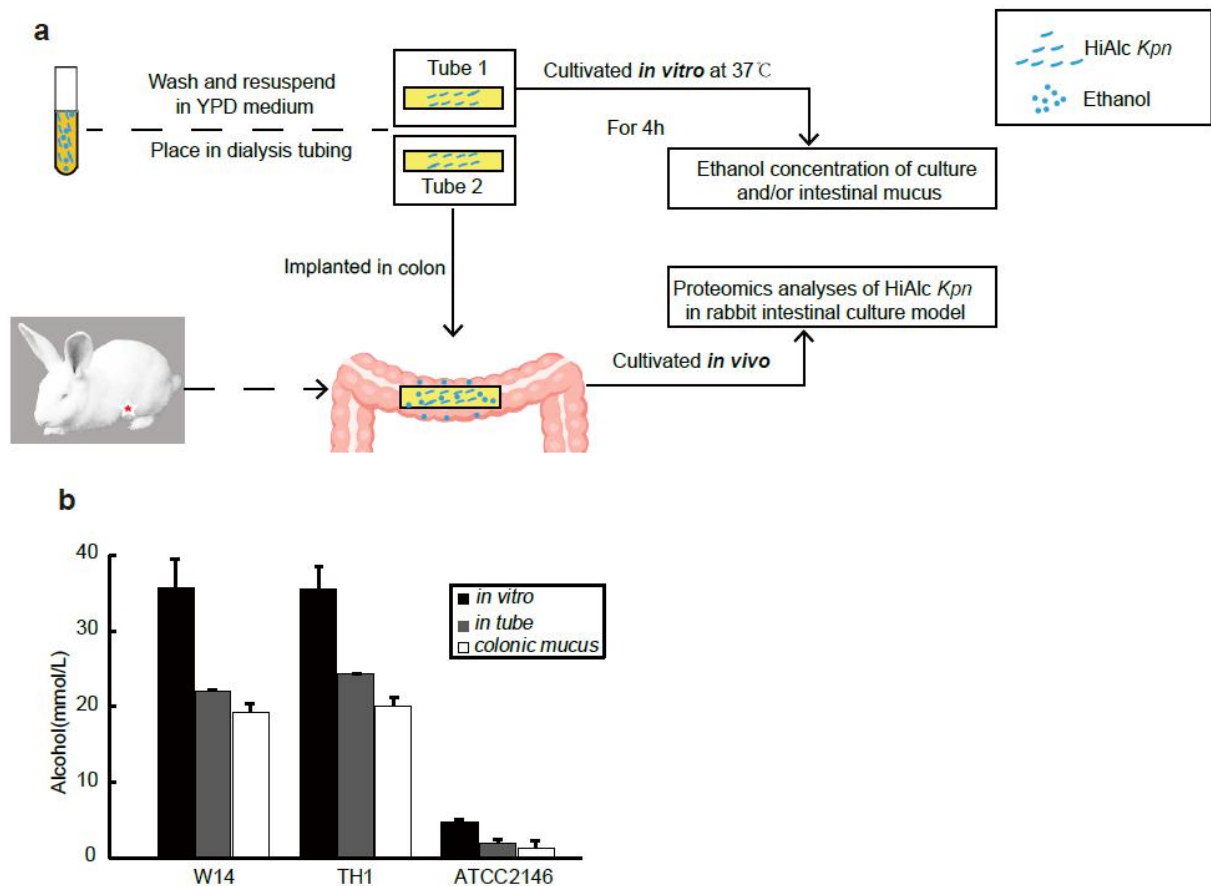

761

762 **Figure S4.**

763 **The model for rabbit intestinal culture and proteomic analysis of HiAlc *Kpn* in the *in vivo* and *in***  
764 ***vitro* conditions. (a) Schematic presentation of the rabbit intestinal culture model. (b) Alcohol**  
765 **concentration of intestinal mucus after HiAlc *Kpn* W14 and TH1 cultured *in vivo* and *in vitro* for 4h.**

766

767 **Figure S5**

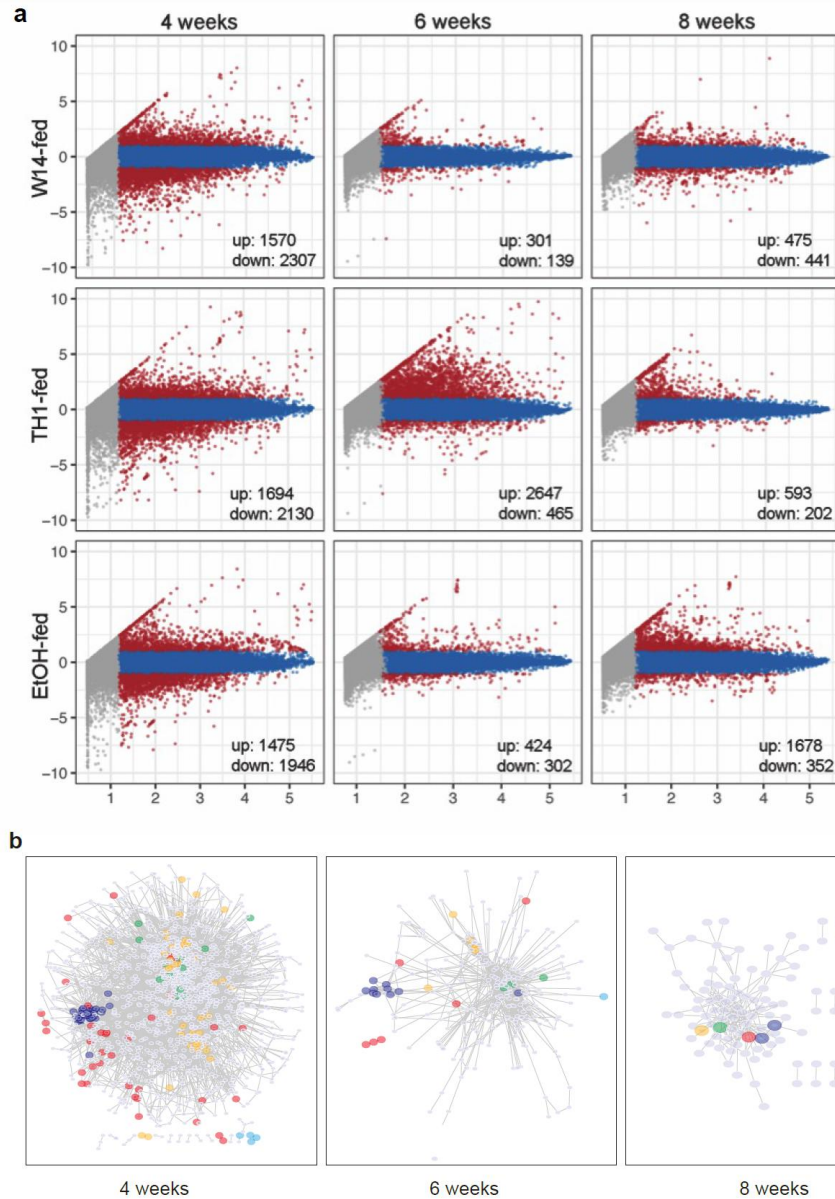

768

4 weeks

6 weeks

8 weeks

769 **Figure S5.**

770 **Enrichment of DEGs and Regulatory networks during HiAlc *Kpn* induced FLD development. (a)**

771 The “Minus-average”(MA) plot to illustrate gene expression profile for pairwise comparison of mice

772 microarray data from HiAlc *Kpn*- and EtOH-fed groups, respectively, against the data from pair-fed

773 group. DEGs (adjusted density  $\geq 2$  folds to pair-fed group) are shown by red dots, and commonly

774 expressed genes are by blue dots, and non-expressed genes are by grey dots, and commonly expressed

775 genes are by blue dots, and non-expressed genes are by grey dots. The gene number of up and down

776 regulated gene were marked at the right bottom for each panels. (b) Regulatory networks of enriched

777 genes after mice fed HiAlc *Kpn* for 4, 6, 8 weeks. We highlight five groups: blue, fatty acid  
 778 metabolism, including CYP, UGT and HSD gene family; red, alcohol, including ADH, ALDH and  
 779 SLC gene family; green, immune and inflammatory factors, including IL and SMAD gene family;  
 780 orange, cancer related factors, including E2F, HIST, RAB and TUBA gene family; and bright blue for  
 781 *Oflr* gene family.

782

783 **Figure S6**

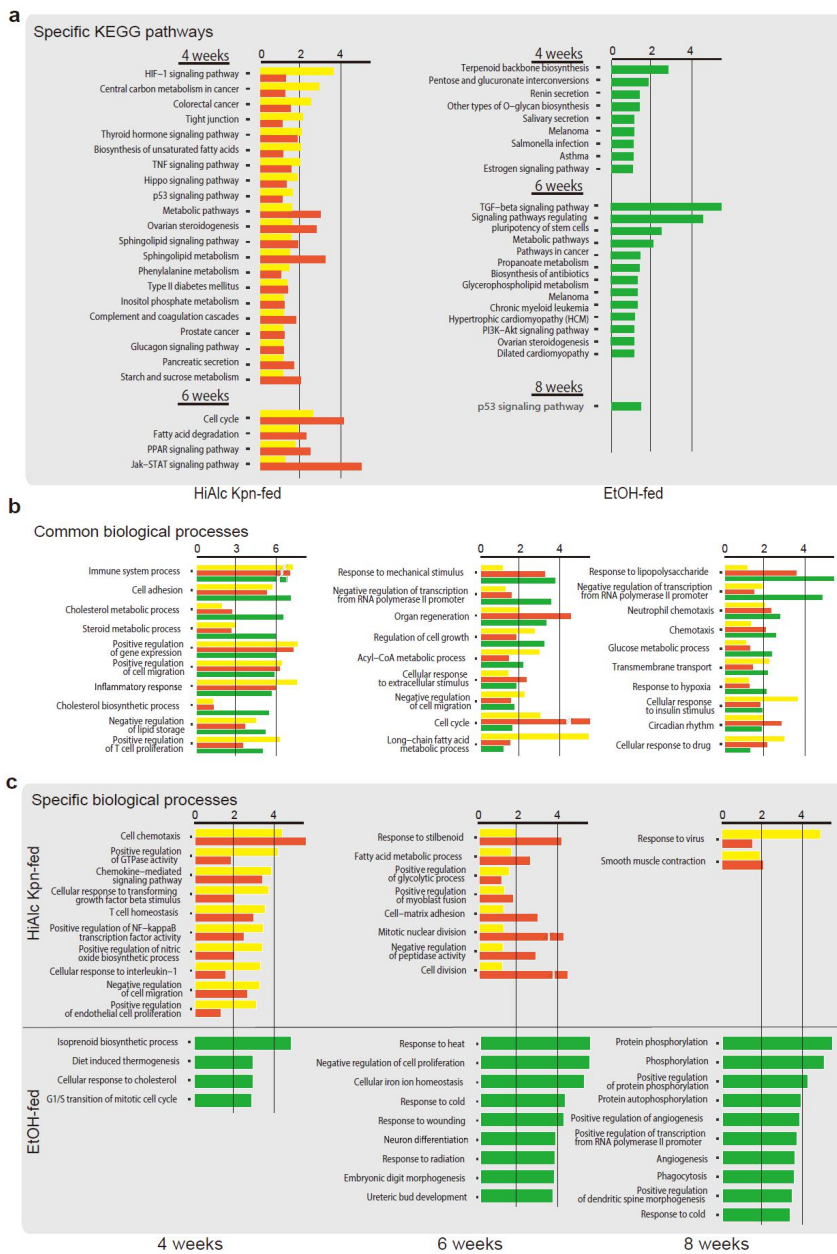

785 **Figure S6.**

786 **Enriched biological process and KEGG pathway compared to pair-fed groups. a,** Specifically  
787 enriched KEGG pathways in HiAlc *Kpn*- and EtOH-fed mice. **b,** Enriched biological processes in both  
788 HiAlc *Kpn*- and EtOH-fed mice. **c,** Specifically enriched biological processes in HiAlc *Kpn*- and  
789 EtOH-fed mice.

790

791 **Figure S7**

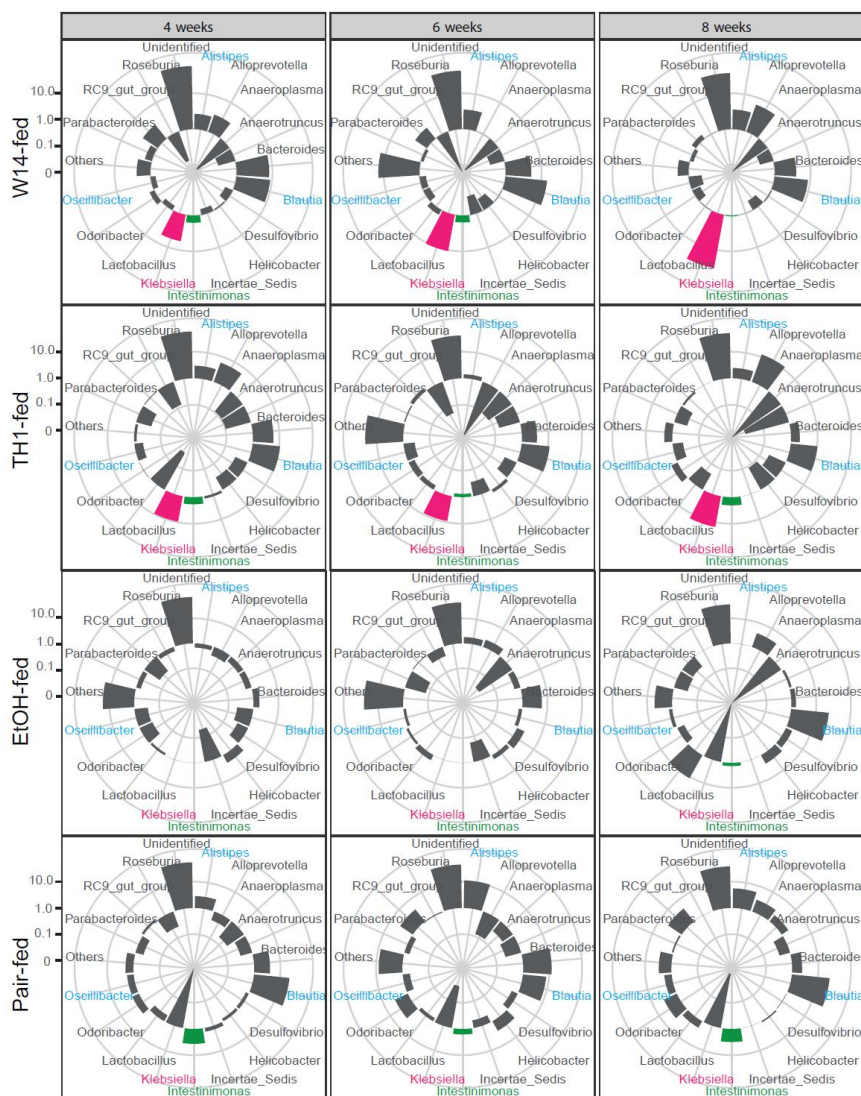

792

793 **Figure S7.**

794 **Analyses of intestinal microbiota in FLD mice at 4, 6 or 8 weeks.**
